# Supplementary material for: Activity of distinct growth factor receptor network components in breast tumors uncovers two biologically relevant subtypes
Source: PubMed Central journal article supplement (PMC5406893; doi:10.1186/s13073-017-0429-x), 2017-04-26
Supplement: 13073_2017_429_MOESM1_ESM.pdf [file 13073_2017_429_MOESM1_ESM.pdf]

## **Additional File 1: Supplemental Results, Figures, and Tables**

### **Supplemental Results**

*Gene set enrichment analysis on RNA-Sequencing signatures.* We performed gene set enrichment analysis, using the *Gene Set Variation Analysis for microarray and RNA-seq data (GSVA)* method, to better understand the biological significance and discover enriched gene sets between our RNA-sequencing signatures: AKT, BAD, EGFR, HER2, IGF1R, KRAS, and RAF1 and GFP controls. We analyzed 1370 gene sets from the C2: canonical pathways collection from the Molecular Signatures Database (See Methods section in manuscript). Gene sets representing cell cycle pathways were found to be enriched across all signatures, however each signature also showed enrichment for expected and unique gene sets (See Additional File 5.xlsx for full results). For example, the HER2 signature was primarily enriched for immune system and cellular adhesion pathways (Supplemental Table 6; Additional File 1). The IGF1R signature was dominated by metabolic pathways (Supplemental Table 7; Additional File 1). The AKT signature was enriched for immune, apoptotic, and metabolic pathways (Supplemental Table 8; Additional File 1). The BAD signature was enriched for immune system and cell cycle pathways (Supplemental Table 9; Additional File 1). EGFR was dominated by DNA replication and cell cycle pathways (Supplemental Table 10; Additional File 1). KRAS and RAF were highly enriched for MAPK pathways (Supplemental Tables 11- 12; Additional File 1), but RAF also showed enrichment for TGF $\beta$  and immune system pathways (Supplemental Tables 11-12; Additional File 1). This results highlight the variety of biological pathway differences which can be found by overexpressing GFRN components, further illustrating the need for GFRN pathway activation signatures.

## Supplemental Figures

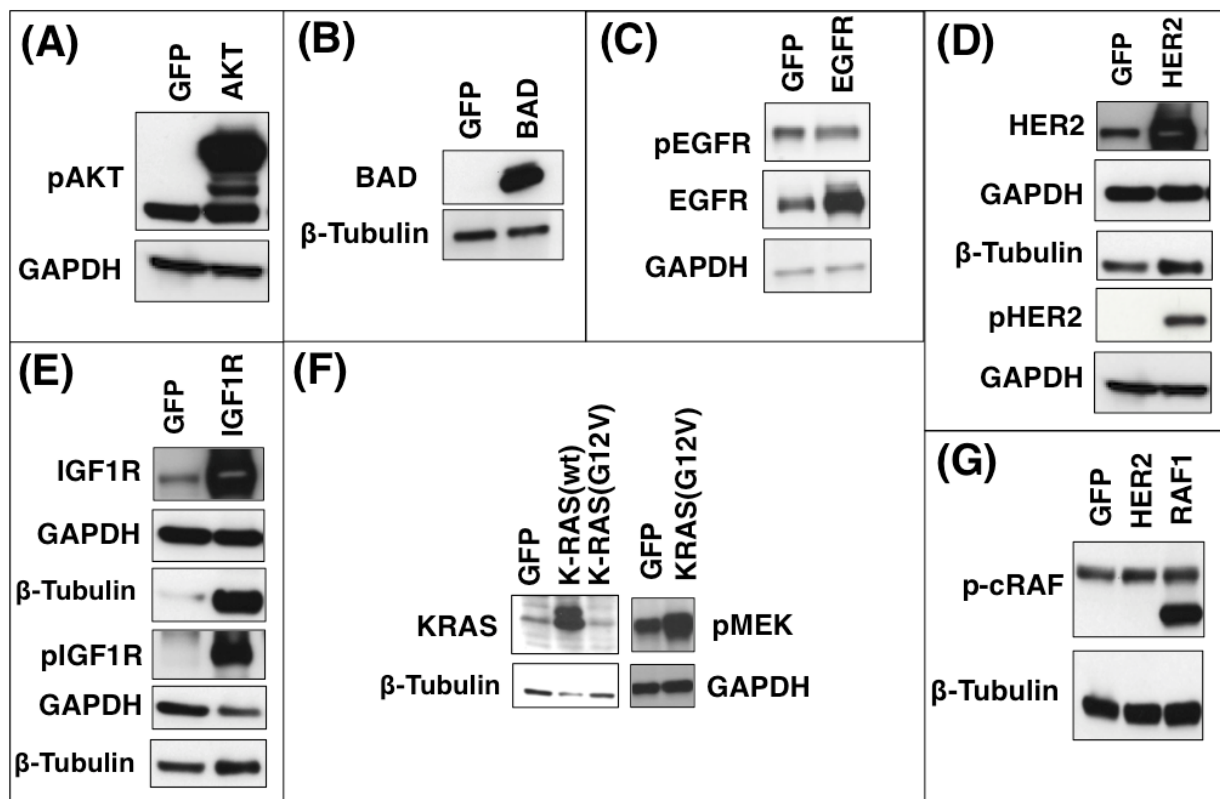

**Supplemental Figure 1: Validation of protein overexpression for each GFRN signature.** Protein lysates from human primary mammary epithelial cells (HMECs) overexpressing GFRN genes were compared to GFP control protein lysates using Western blotting. **(A)** HMECs overexpressing AKT1 compared to GFP (GAPDH loading control) **(B)** HMECs overexpressing BAD, compared to GFP ( $\beta$ -tubulin loading control) **(C)** HMECs overexpressing EGFR and pEGFR compared to GFP (GAPDH loading control) **(D)** HMECs overexpressing HER2 and pHER2 compared to GFP (GAPDH and  $\beta$ -tubulin loading controls) **(E)** HMECs overexpressing IGF1R and pIGF1R (GAPDH and  $\beta$ -tubulin loading controls) **(F)** HMECs overexpressing pMEK compared to GFP ( $\beta$ -tubulin and GAPDH loading controls) **(G)** HMECs overexpressing RAF1 compared to GFP controls ( $\beta$ -tubulin loading controls).

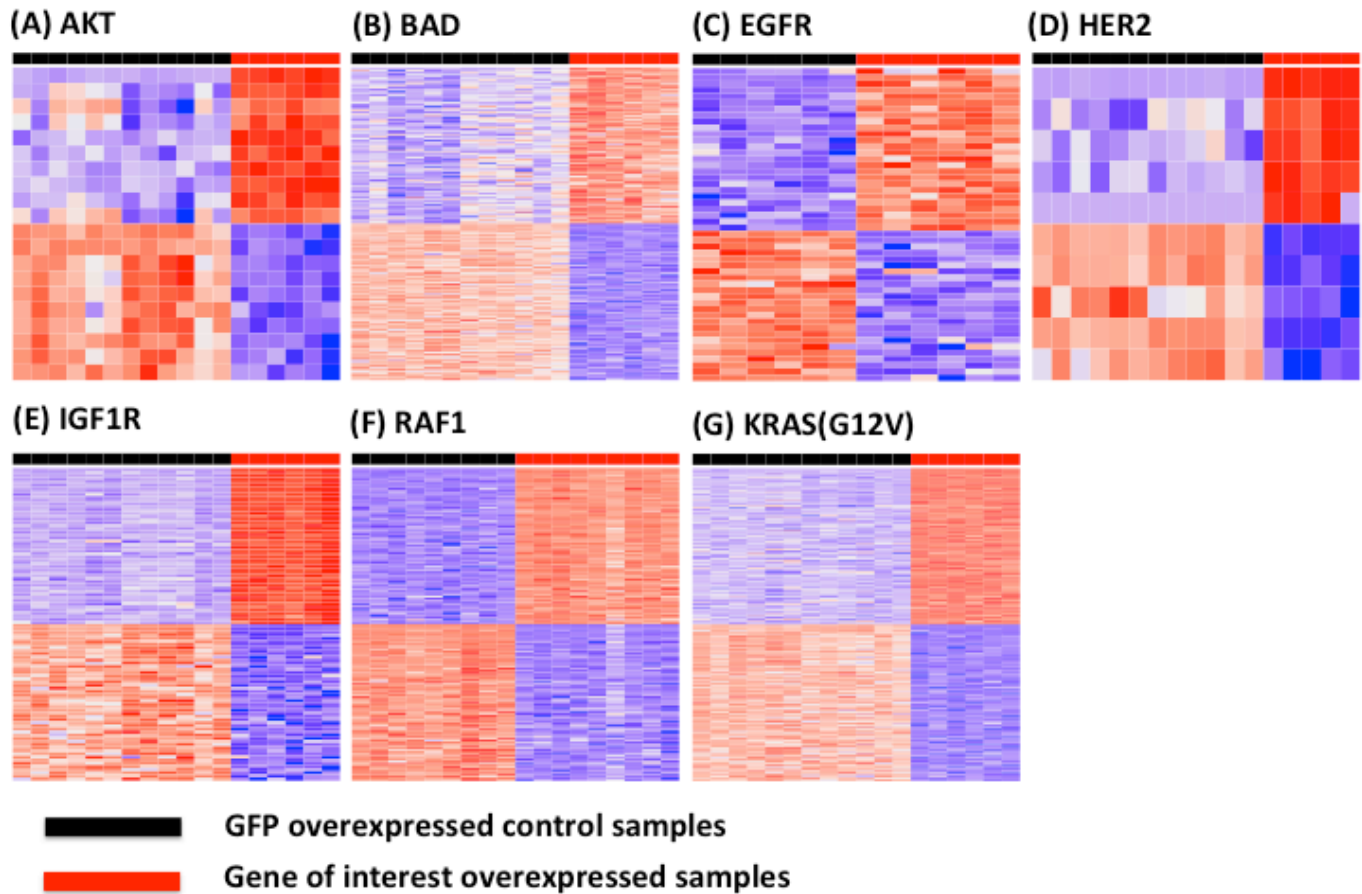

**Supplemental Figure 2: Gene expression signatures for key GFRN pathways generated by ASSIGN.** (A) AKT 20 gene signature, (B) BAD 250 gene signature, (C) EGFR 50 gene signature, (D) HER2 10 gene signature, (E) IGF1R 100 gene signature, (F) KRAS (G12V) 200 gene signature, and (G) RAF1 350 gene signature. The horizontal black bar indicates green fluorescent protein (GFP) overexpressing control samples, and the red bar indicates the overexpressed genes of interest (i.e., *AKT1*, *BAD*, *EGFR*, *ERBB2* (*HER2*), *IGF1R*, *KRAS* (*G12V*), and *RAF1*, respectively) signature samples. The signature genes for each pathway are listed in Additional File 4.

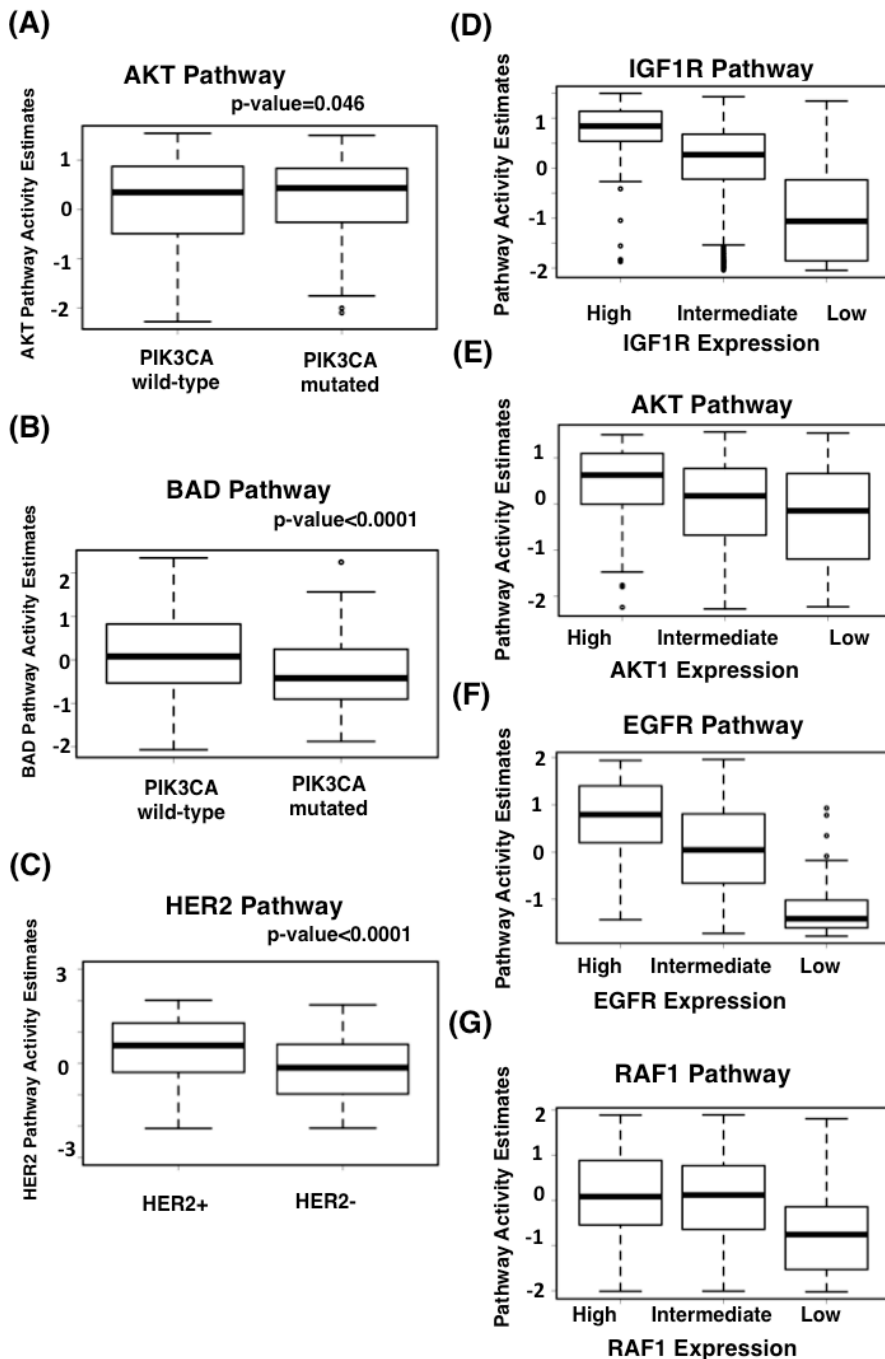

**Supplemental Figure 3: Additional GFRN gene expression signature validations in TCGA breast cancer data.** Pathway activity estimate boxplots between the **(A)** AKT pathway and **(B)** BAD pathway between *PI3KCA* mutated and *PI3KCA* wild-type TCGA breast cancer samples (n=787). Any mutation in *PI3KCA* was considered pathogenic in this mutation analysis. **(C)** HER2 pathway activation estimates between HER+ and HER- patient TCGA samples (n=708). Pathway activation estimates for **(D)** IGF1R, **(E)** AKT, **(F)** EGFR, and **(G)** RAF1 between 'high', 'intermediate', and 'low' expressing samples in 1119 BRCA TCGA samples. Samples with 90 percentile or higher expression were considered 'high', 10 percentile or lower were considered 'low', and 10 to 90 percentile were considered 'Intermediate' expressing samples for AKT1, EGFR and RAF1. For IGF1R validation, samples with 80 percentile or higher IGF1R expression were considered 'high', 20 percentile or lower was considered 'low', and 20 to 80 percentile expression were considered 'Intermediate' expressing samples.

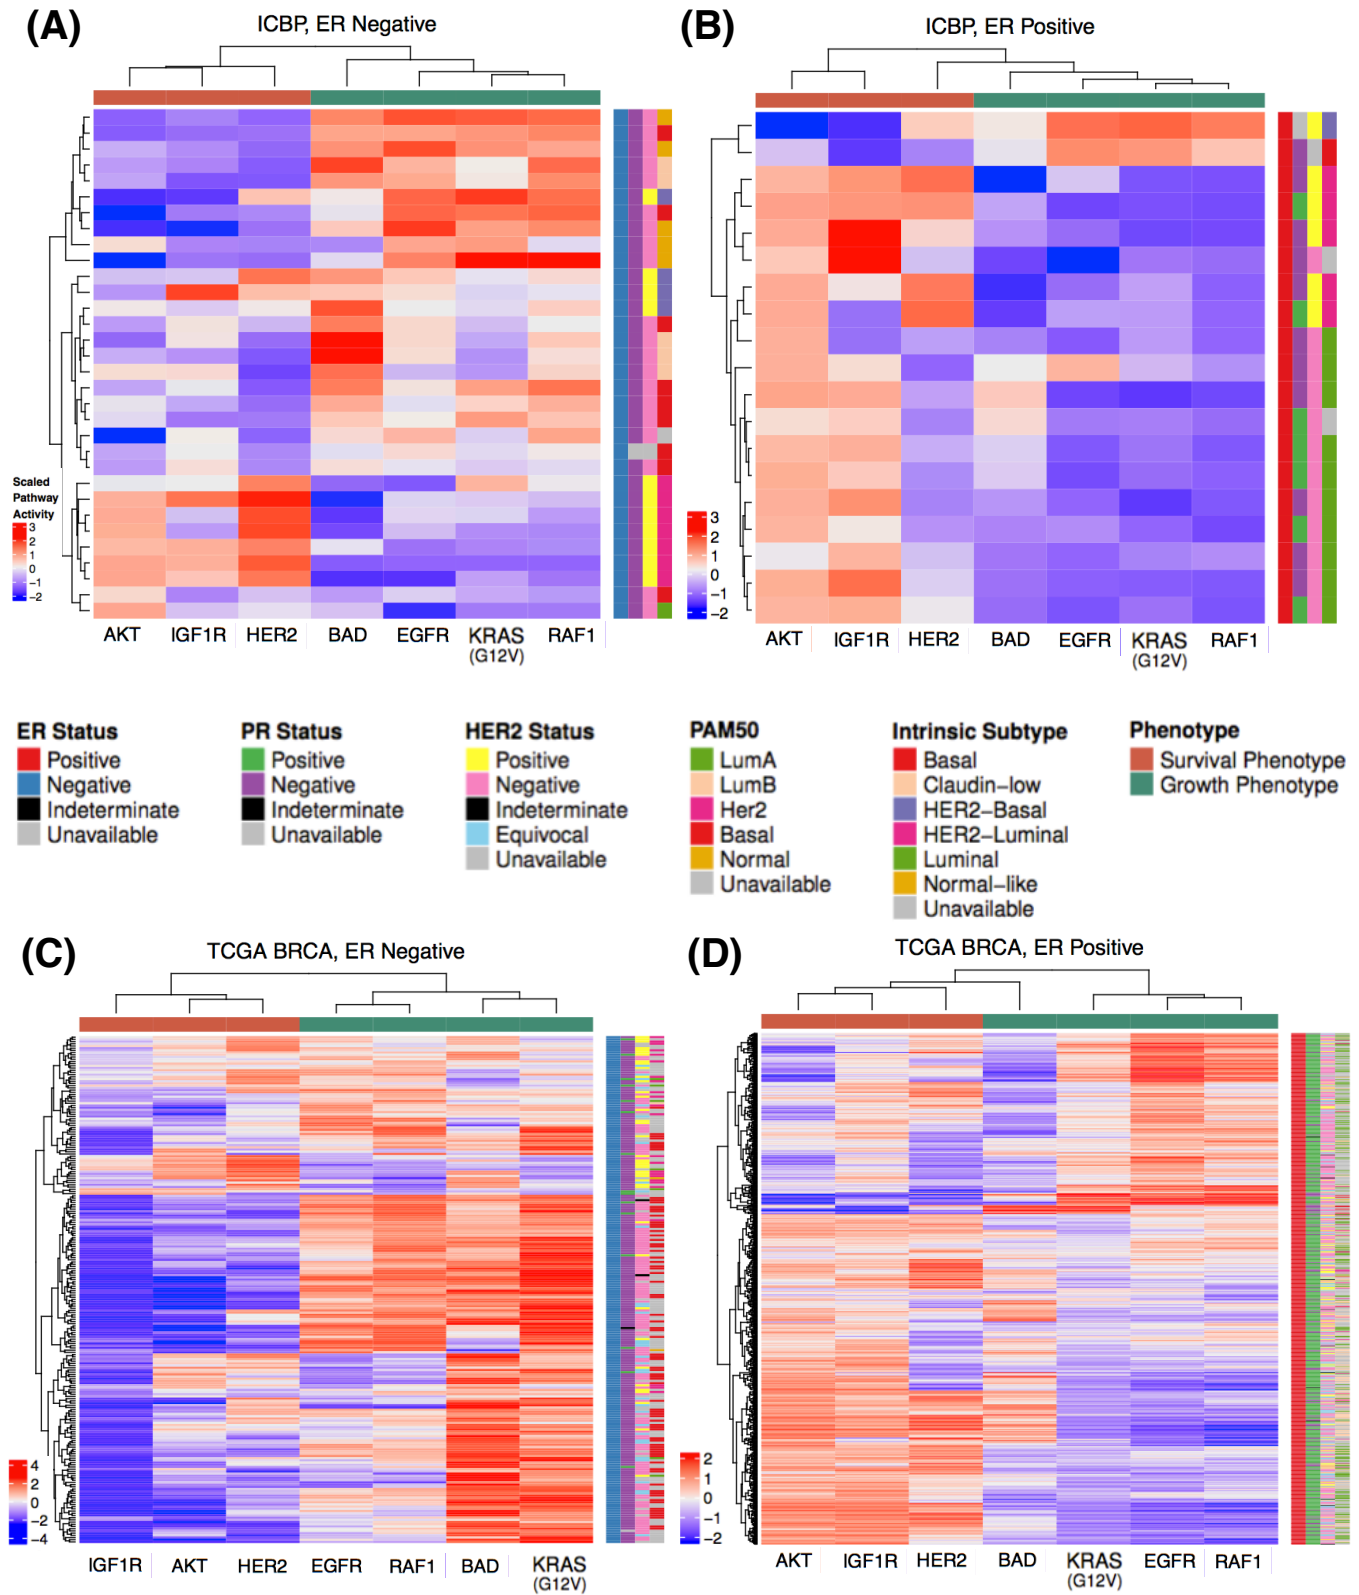

**Supplemental Figure 4: Pathway activity estimates between ER+ and ER- samples in breast cancer cell lines and patient data. (A) 19 ER- breast cancer cell lines from ICBP, (B) 32 ER+ breast cancer cell lines from ICBP. (C) 230 ER- breast cancer patient samples from TCGA, and (D) 785 ER+**

breast cancer patient samples from TCGA. The growth phenotype is represented in aquamarine above the heat map, and the survival phenotype in coral. Subtypes determined by immunohistochemistry (ER, PR, and HER2), intrinsic subtyping, and PAM50, are label in the right side of the heatmap.

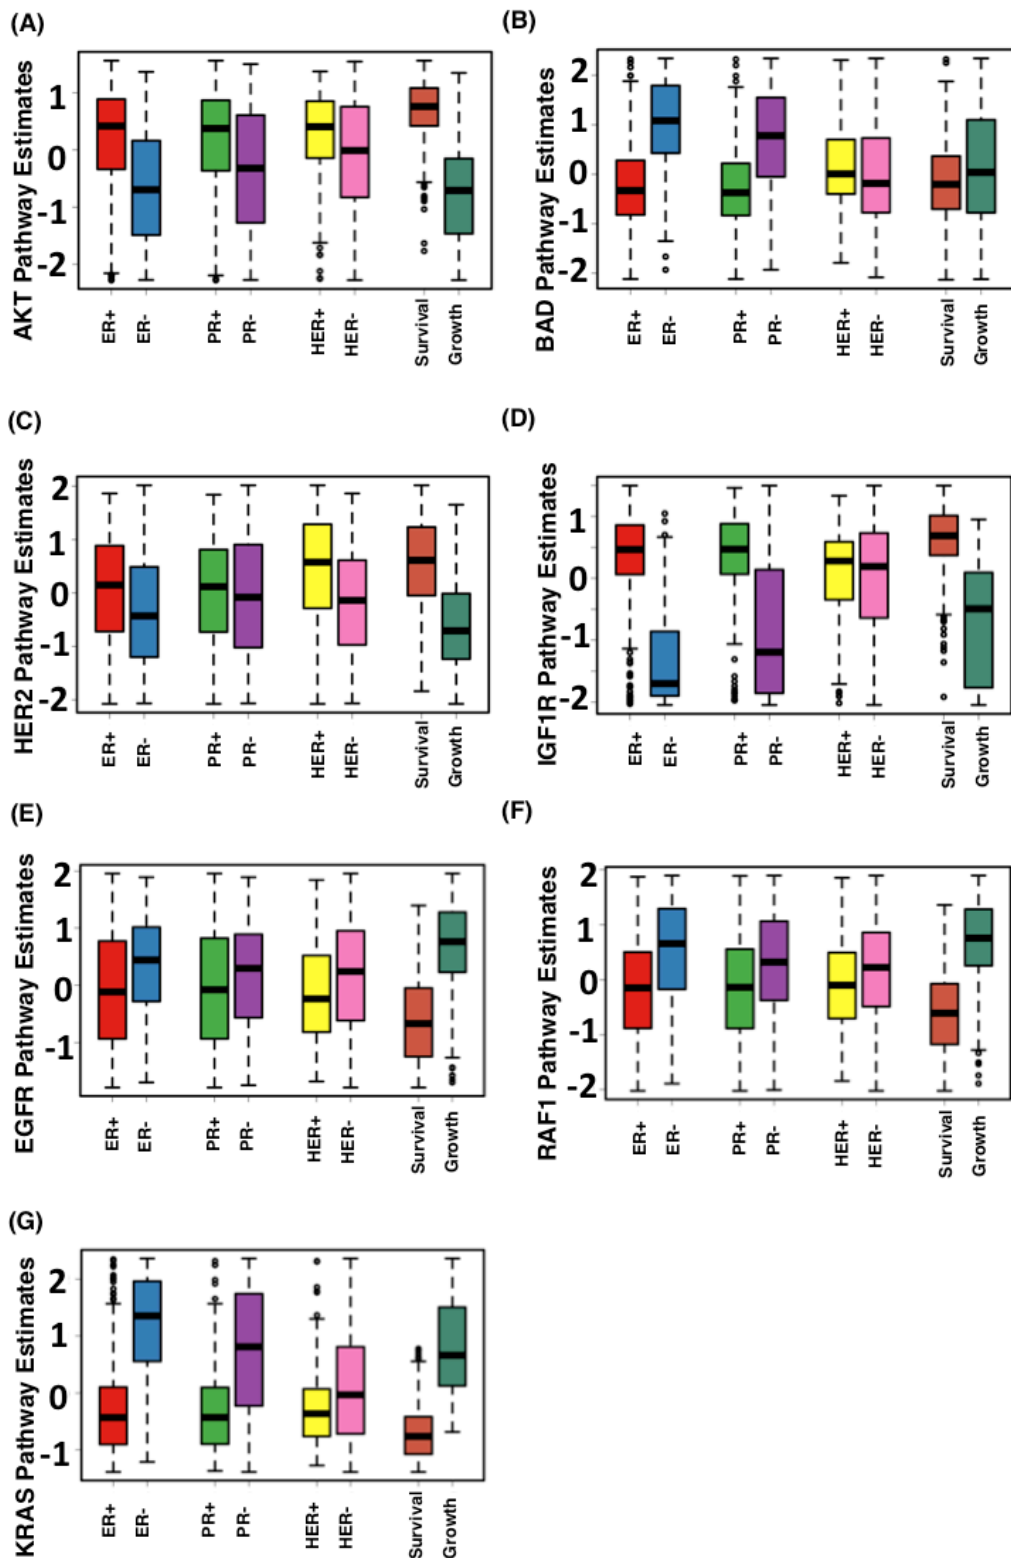

**Supplemental Figure 5: Pathway activation estimates across clinical subtypes (IHC-based, N=1012) in TCGA breast cancer data for (A) the AKT pathway (B) the BAD pathway (C) the HER2 pathway (D) the IGF1R pathway (E) the EGFR pathway (F) the RAF1 pathway (G) the KRAS pathway.**

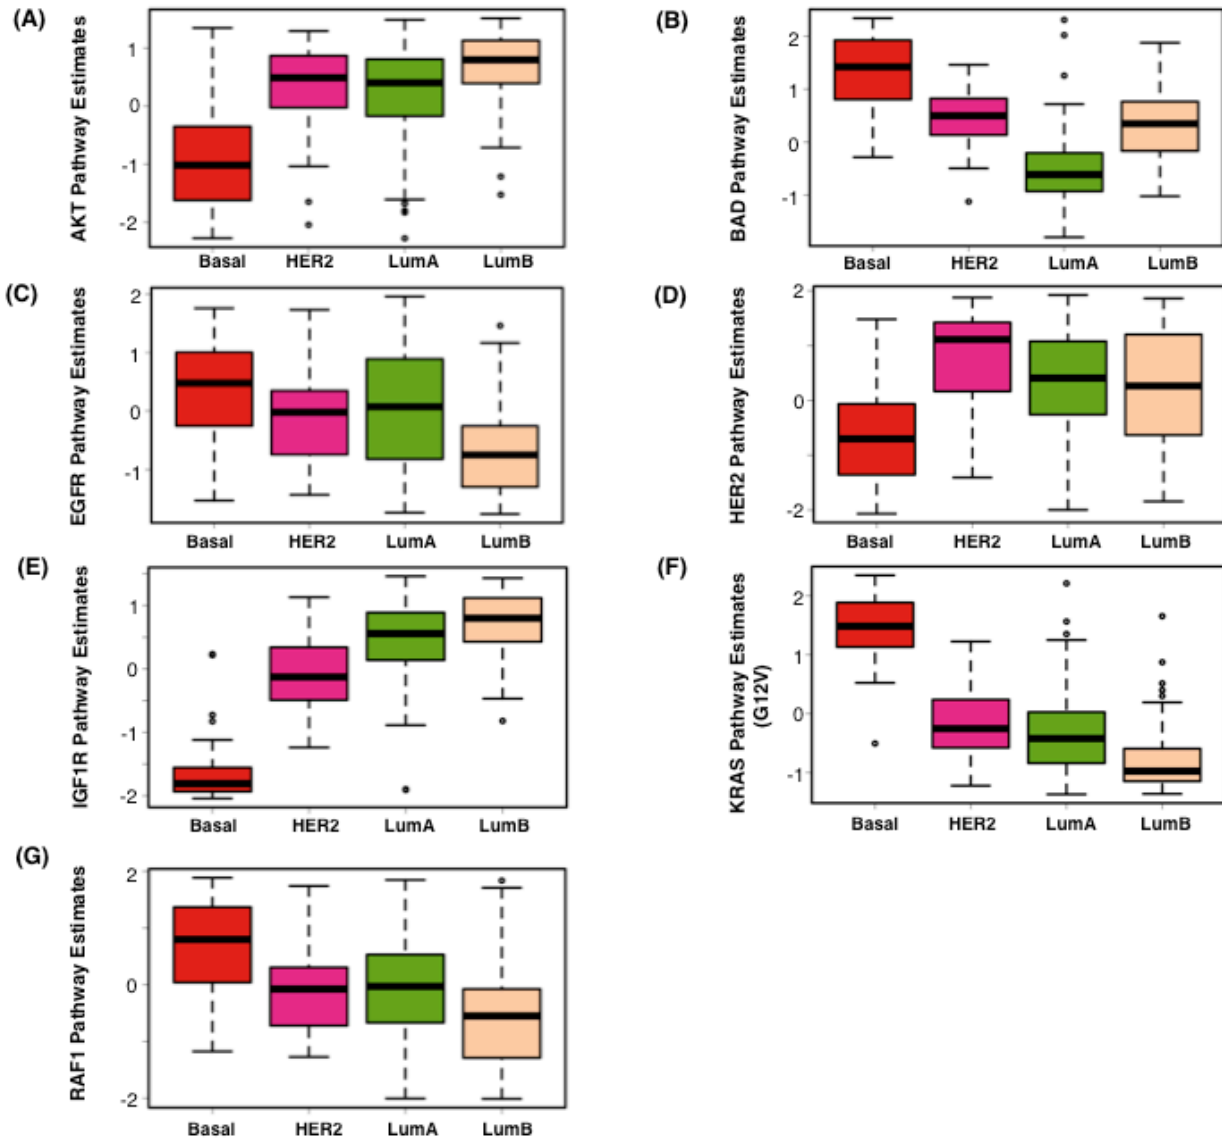

**Supplemental Figure 6: Pathway activation estimates across intrinsic subtypes (PAM50 based, N=510) in TCGA breast cancer data for (A) the AKT pathway (B) the BAD pathway (C) the EGFR pathway (D) the HER2 pathway (E) the IGF1R pathway (F) the KRAS pathway (G) the RAF1 pathway estimates.**



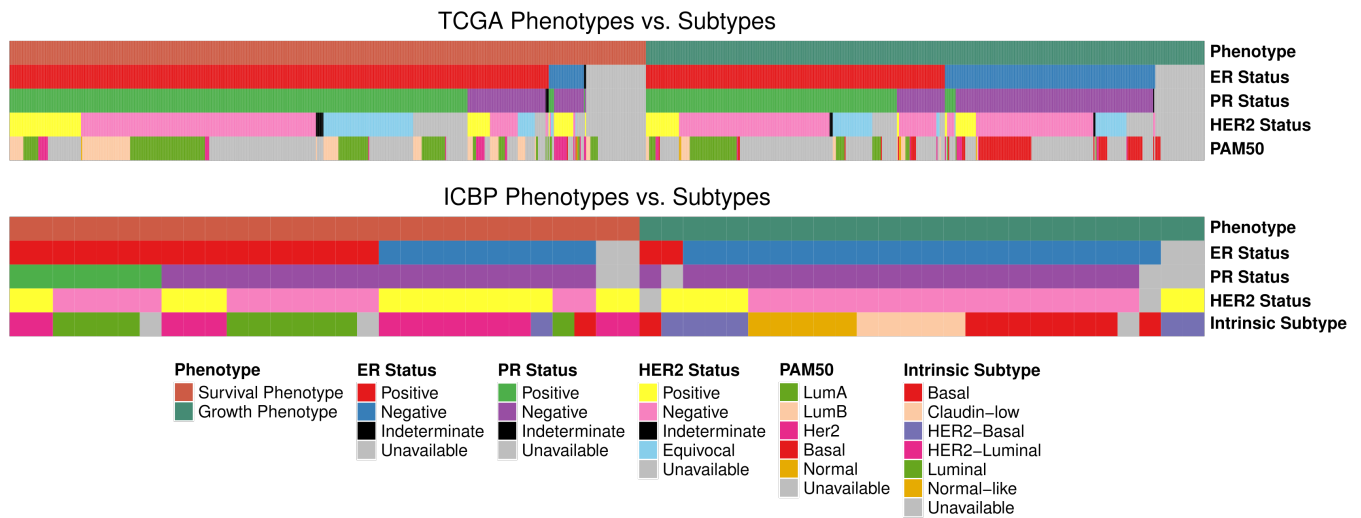

**Supplemental Figure 7: Graphical representation of the IHC and intrinsic subtype status distribution for ICBP cell line and TCGA breast tumors.** Each sample is represented along the X-axis and corresponding phenotype, ER, PR, HER2 and intrinsic subtype status is represented along the Y-axis. Supplemental Table 9 and 10 provides breakdown of each category, for ICBP and TCGA.

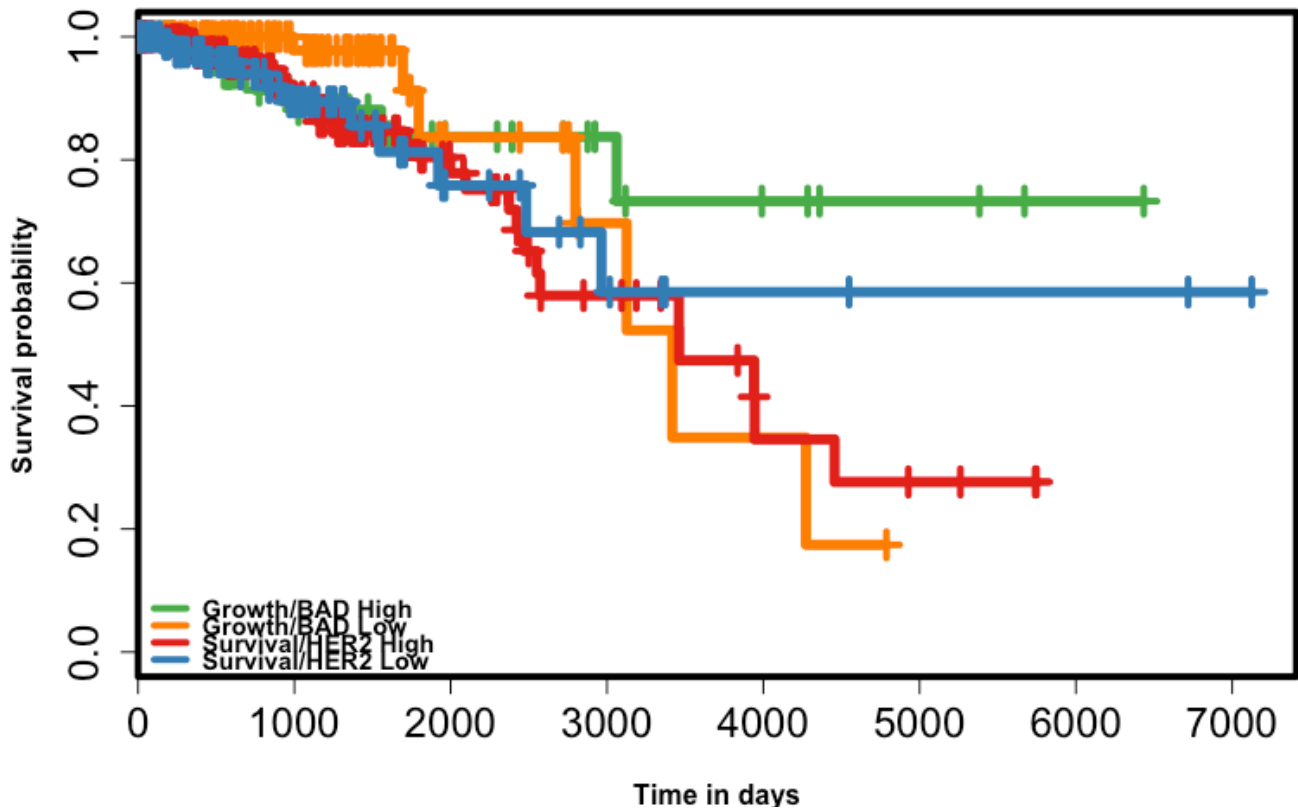

**Supplemental Figure 8: Survival analysis of the four subgroups in TCGA BRCA samples (N=1119).** Kaplan-Meier survival analysis for the four identified subgroups using the Peto and Peto modification of Gehan-Wilcoxon test did not show significant differences across the subgroups ( $\lambda^2=5.5$ ,  $p=0.141$ ).

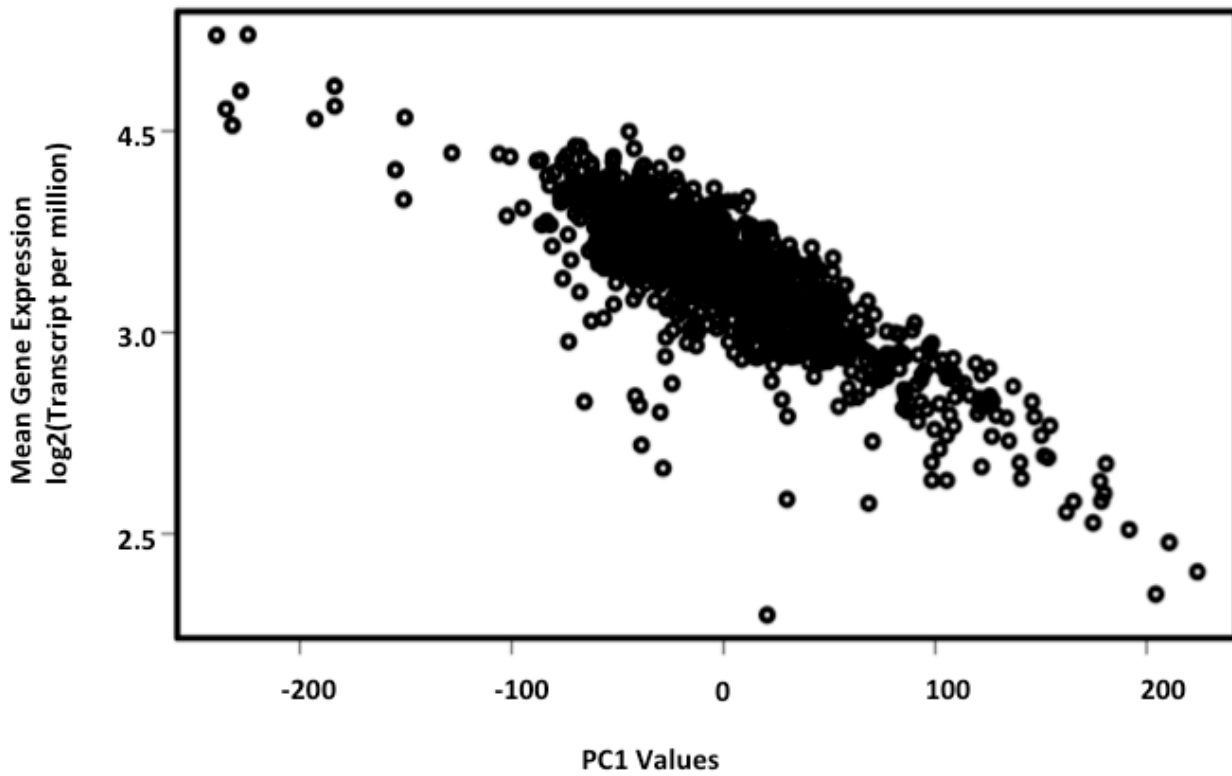

**Supplemental Figure 9:** Correlation between mean gene expression values for all samples and the principal component values for each sample for principal component 1 based from breast cancer (BRCA) TCGA RNA-sequencing samples (Spearman's correlations: -0.786, p-value <0.0001).

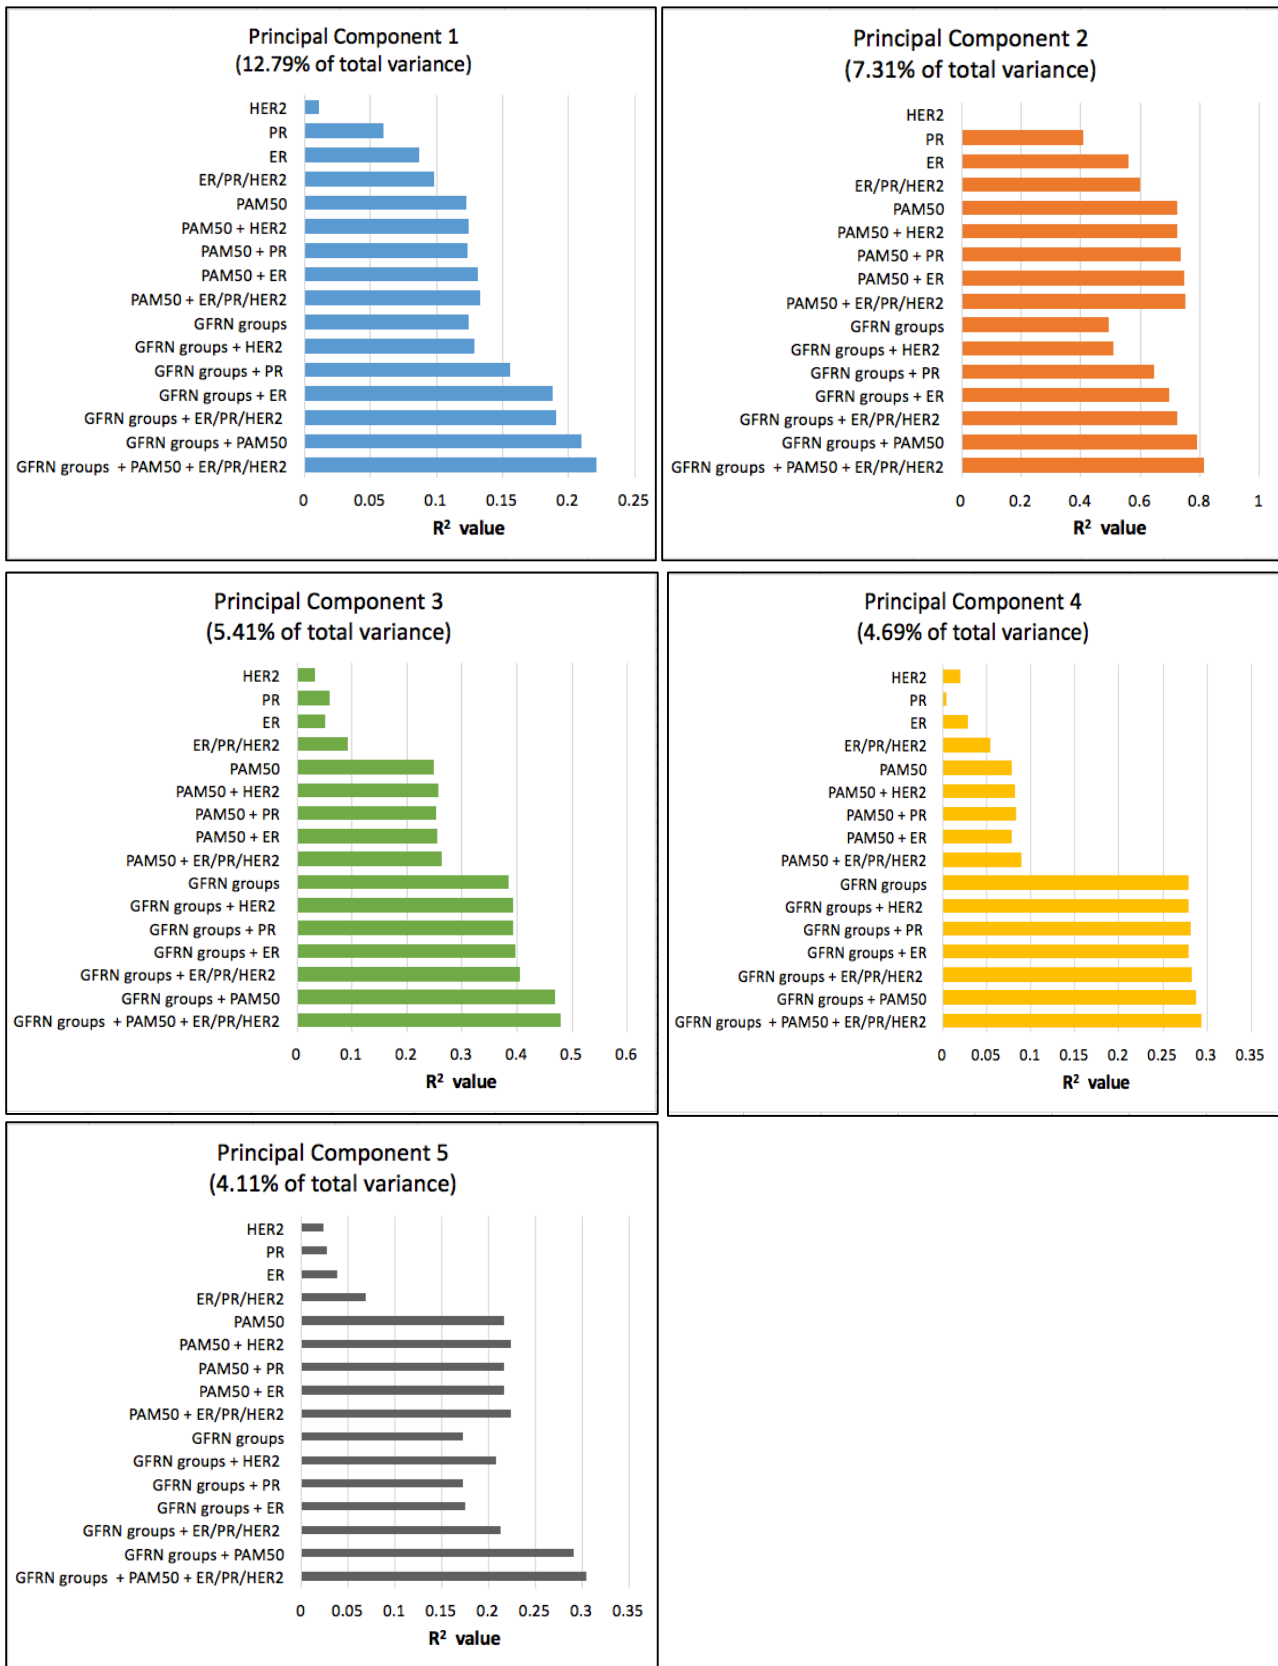

**Supplemental Figure 10:** Comparison of R<sup>2</sup> values (proportion of variance) explained by each model for principle components (PCs) 1 through 5 from TCGA RNA-sequencing breast cancer data. For each PC,

model variables include GFRN subtypes, intrinsic subtypes (PAM50), clinical subtypes (ER, ER, and HER2 status) and their combinations.

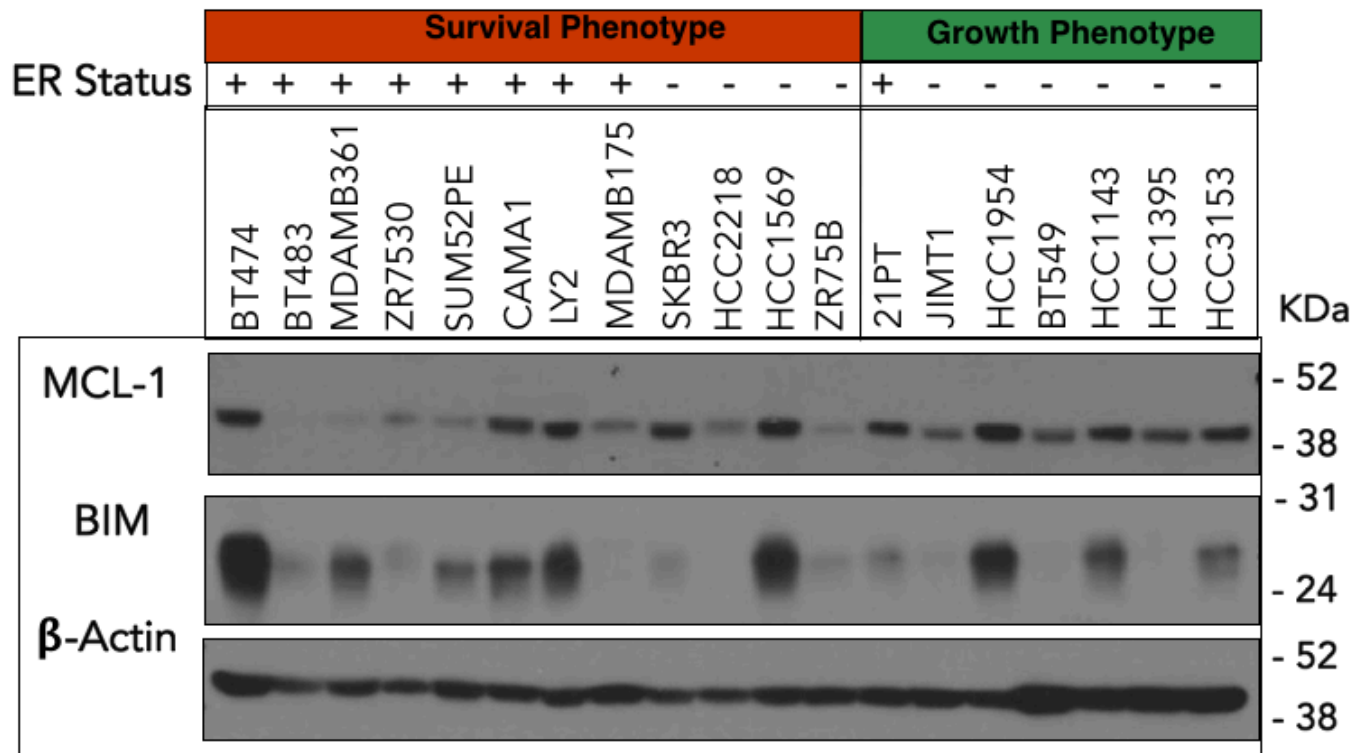

**Supplemental Figure 11: Independent western blot assay for MCL-1 and BIM proteins between breast cancer cell lines from the survival and growth phenotypes.** Lysates from 12 cell lines from the survival phenotype (8 ER+ and 4 ER-) and 7 cell lines from the growth phenotype (1 ER+ and 6 ER-) were probed for anti- and pro-apoptotic proteins, MCL-1 and BIM, and compared to  $\beta$ -actin (loading control).

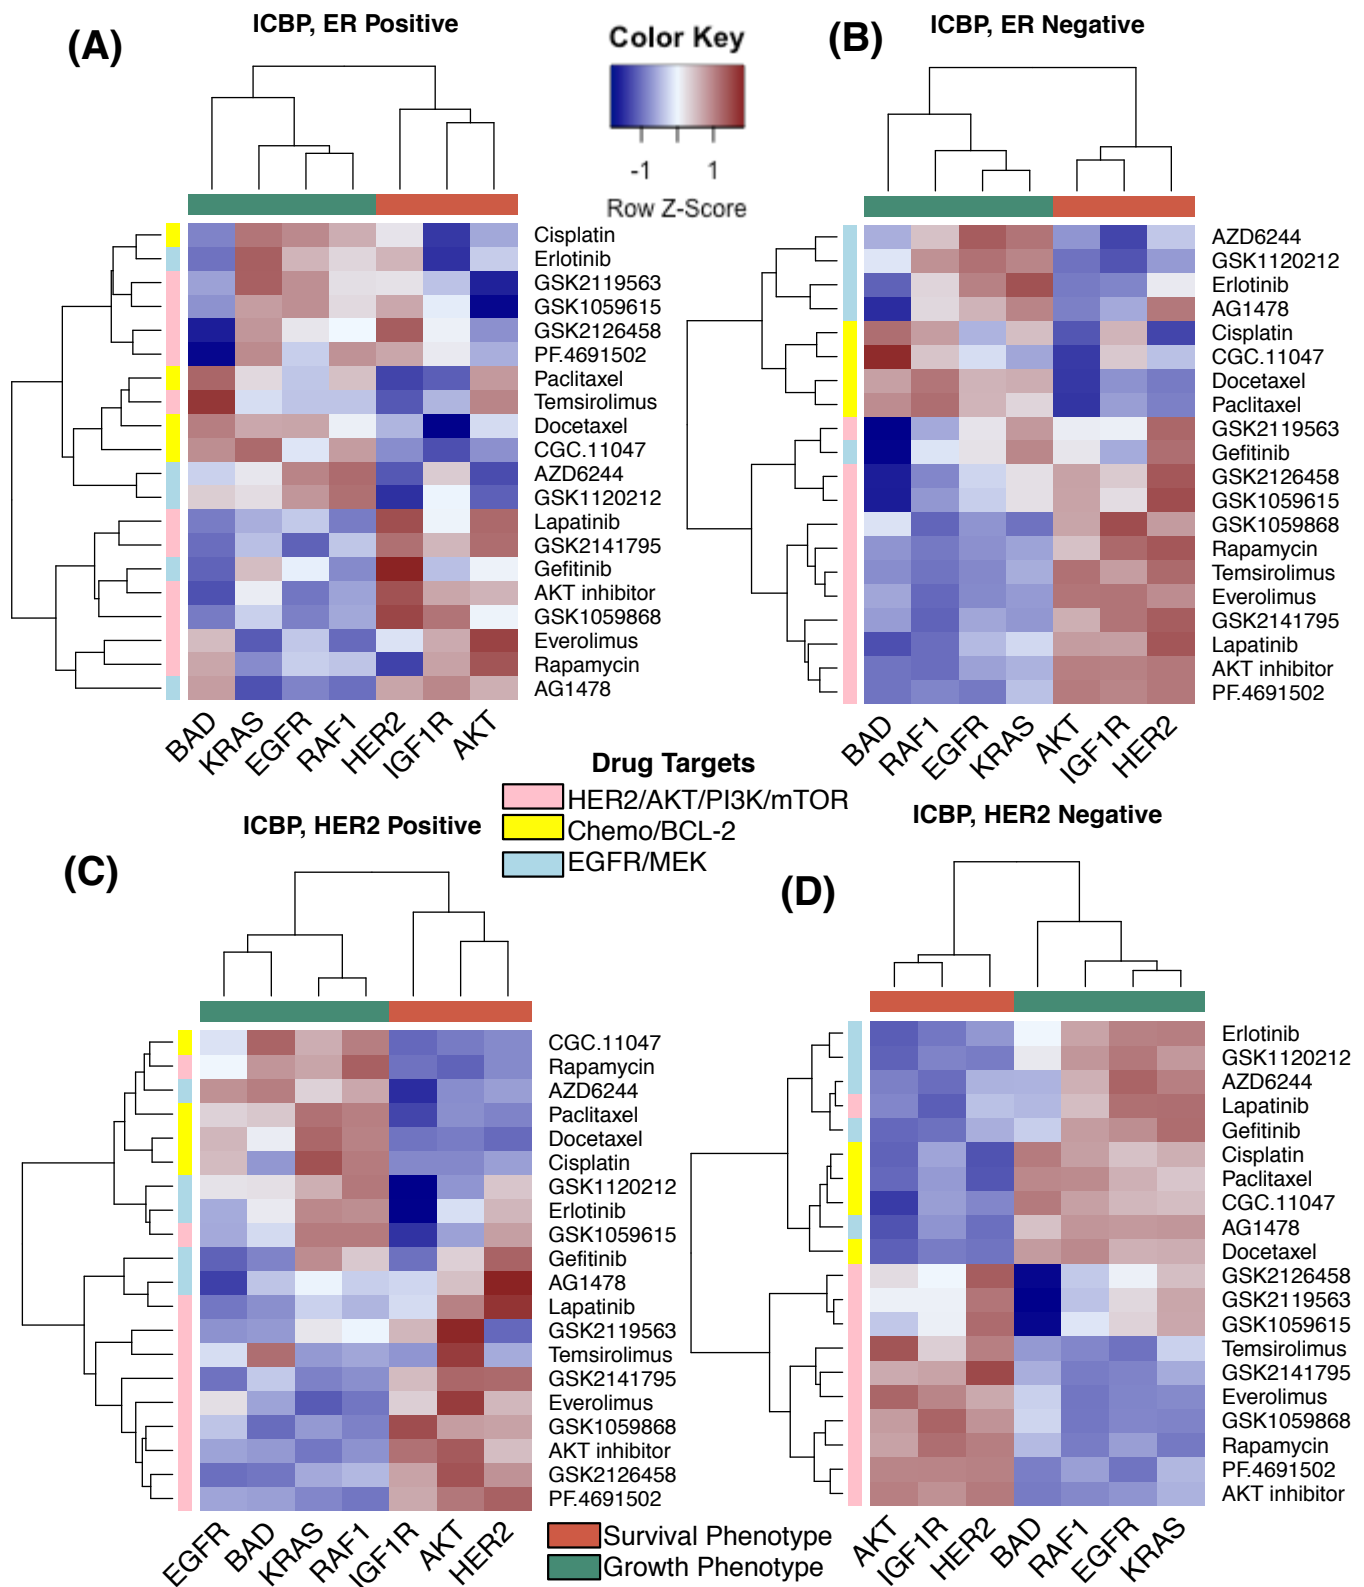

**Supplemental Figure 12: Correlations between pathway activation estimates and drug response values between ER+ and ER- and between HER+ and HER2- samples in breast cancer cell lines.** Colors correspond to scaled Spearman correlations between specific pathway activation estimates generated with ASS/IGN and drug sensitivity (-logG150) across **(A)** 18 ER+ breast cancer cell lines, **(B)** 32 ER- breast cancer cell lines from the ICBP panel, **(C)** 18 HER2+ breast cancer cell lines, and **(D)** 32

HER2- breast cancer cell lines from the ICBP panel. Red represents positive correlation and blue represents negative correlation. Pathways cluster across the x-axis as (coral color) survival phenotype and (green) growth phenotype. Drug classes are represented along the y-axis as pink (HER2/AKT/PI3K/mTOR targeted-therapies), yellow (chemotherapies/BCL-2 targeting therapies), and blue (EGFR/MEK targeted-therapies).

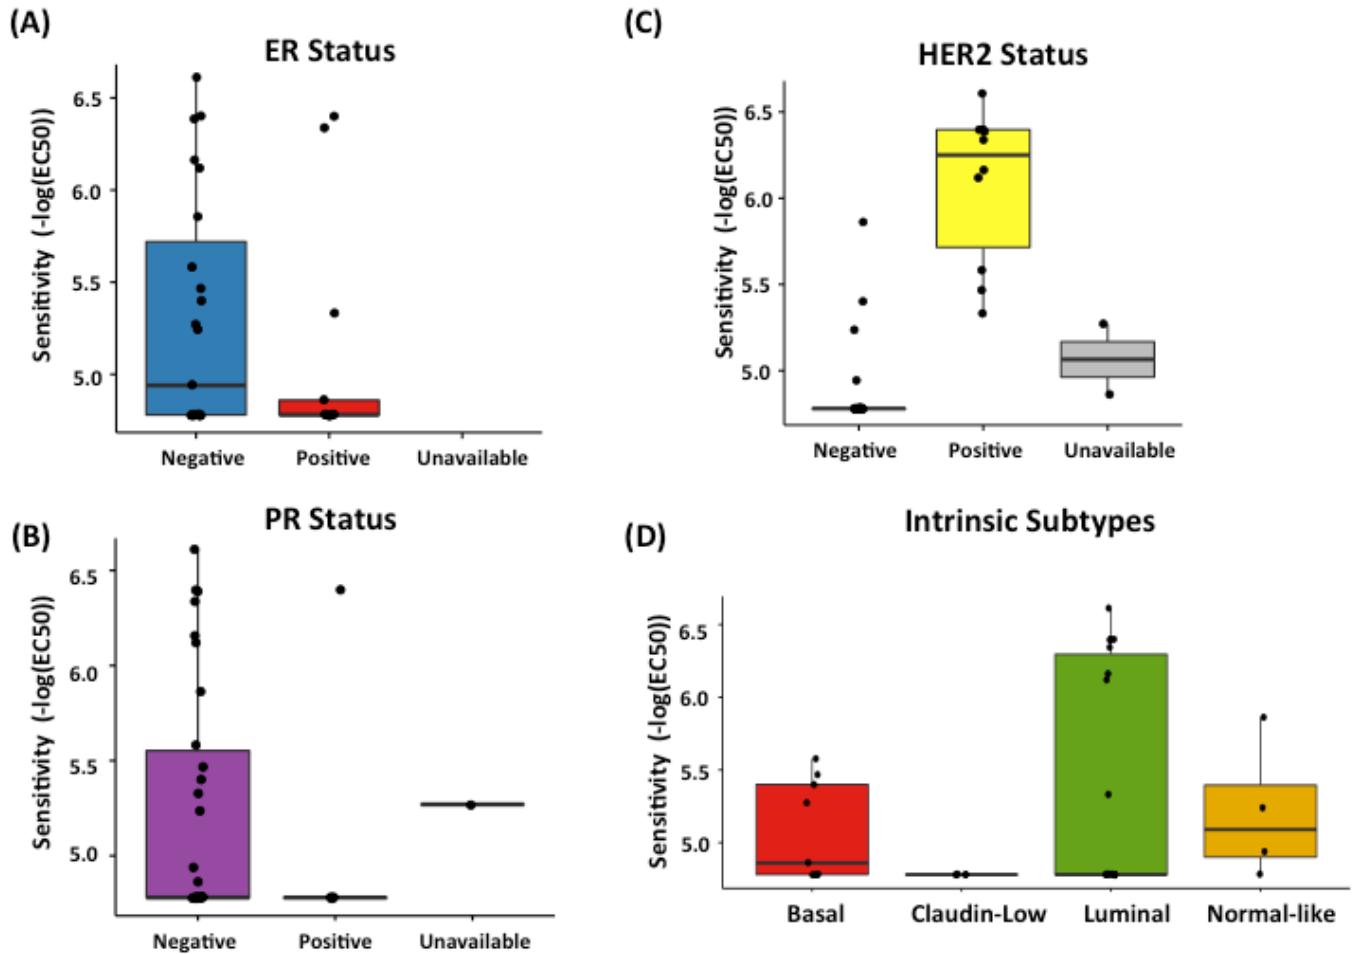

**Supplemental Figure 13: Comparison of lapatinib sensitivity based on (A) ER status, (B) PR status, (C) HER2 status, (D) Intrinsic Subtypes in ICBP breast cancer cell lines. Drug sensitivity is measured in  $-\log EC_{50}$ .**



## Supplemental Tables

**Supplemental Table 1:** Spearman correlations between pathway activation estimates and proteomics data for optimum signature selection in ICBP cell line and TCGA proteomics data.

| Pathway     | Optimized Number of Genes | Protein         | ICBP        |          | TCGA        |          |
|-------------|---------------------------|-----------------|-------------|----------|-------------|----------|
|             |                           |                 | Correlation | p-value  | Correlation | p-value  |
| AKT         | 20                        | Akt             | 0.576       | 2.03E-04 | 0.192       | 1.54E-07 |
|             |                           | PDK1            | 0.574       | 2.14E-04 | 0.239       | 5.93E-11 |
|             |                           | PDK1_pS241      | 0.535       | 6.50E-04 | 0.337       | 5.84E-21 |
| BAD         | 250                       | Akt             | -0.456      | 4.33E-03 | -0.150      | 4.43E-05 |
|             |                           | PDK1            | -0.605      | 8.14E-05 | -0.313      | 4.37E-18 |
|             |                           | PDK1_pS241      | -0.518      | 1.02E-03 | -0.232      | 2.23E-10 |
| EGFR        | 50                        | EGFR            | 0.470       | 0.050    | 0.357       | 2.09E-23 |
|             |                           | EGFR_pY1068     | 0.397       | 0.028    | 0.129       | 4.50E-04 |
|             |                           | EGFR_pY1173     |             |          | 0.155       | 2.44E-05 |
| HER2        | 10                        | HER2            | 0.923       | 0.00E+00 | 0.376       | 1.61E-05 |
|             |                           | HER2_pY1248     | 0.953       | 0.00E+00 | 0.356       | 1.37E-04 |
| IGF1R       | 100                       | IRS1            |             |          | 0.324       | 2.37E-19 |
|             |                           | IGF1R           | 0.086       | 0.608    |             |          |
|             |                           | PDK1            | 0.569       | 2.45E-04 | 0.371       | 2.68E-25 |
|             |                           | PDK1_pS241      | 0.509       | 1.26E-03 | 0.403       | 5.33E-30 |
| KRAS (G12V) | 200                       | EGFR            | 0.423       | 8.57E-03 | 0.493       | 4.05E-46 |
|             |                           | EGFR_pY1068     | 0.296       | 7.17E-02 | 0.089       | 1.60E-02 |
|             |                           | EGFR_pY1173     |             |          | 0.090       | 1.47E-02 |
|             |                           | MEK1            |             |          | 0.116       | 1.69E-03 |
| RAF         | 350                       | MEK1            | 0.285       | 0.084    | 0.245       | 1.72E-11 |
|             |                           | PKC.alpha       | 0.467       | 3.46E-03 | 0.396       | 6.36E-29 |
|             |                           | PKC.alpha_pS657 | 0.462       | 3.83E-03 | 0.415       | 0.00E+00 |

**Supplemental Table 2:** Top 50 gene sets predicted by GSEA between GFP (control) and HER2 overexpressing RNA-sequencing data in HMECs. Distinguishing pathways are in red.

| Hallmark + canonical (C2) gene sets (Molecular Signatures Database) | logFC         | P.Value           | adj.P.Val     |
|---------------------------------------------------------------------|---------------|-------------------|---------------|
| KEGG ANTIGEN PROCESSING AND PRESENTATION                            | -0.0207       | <0.0001           | <0.0001       |
| REACTOME IL 7 SIGNALING                                             | -0.0239       | <0.0001           | <0.0001       |
| REACTOME CHEMOKINE RECEPTORS BIND CHEMOKINES                        | -0.0281       | <0.0001           | <0.0001       |
| BIOCARTA CBL PATHWAY                                                | 0.0135        | <0.0001           | <0.0001       |
| BIOCARTA COMP PATHWAY                                               | -0.0395       | <0.0001           | <0.0001       |
| PID VEGFR1 PATHWAY                                                  | 0.0087        | <0.0001           | <0.0001       |
| ST_G ALPHA_S PATHWAY                                                | -0.0150       | <0.0001           | <0.0001       |
| BIOCARTA EPONFKB PATHWAY                                            | -0.0176       | <0.0001           | <0.0001       |
| REACTOME CELL EXTRACELLULAR MATRIX INTERACTIONS                     | 0.0180        | <0.0001           | <0.0001       |
| BIOCARTA RB PATHWAY                                                 | 0.0161        | <0.0001           | 0.0001        |
| BIOCARTA IL22BP PATHWAY                                             | -0.0170       | <0.0001           | 0.0001        |
| BIOCARTA IL10 PATHWAY                                               | -0.0125       | <0.0001           | 0.0001        |
| BIOCARTA P53HYPOXIA PATHWAY                                         | -0.0094       | <0.0001           | 0.0001        |
| KEGG PATHOGENIC ESCHERICHIA COLI INFECTION                          | 0.0067        | <0.0001           | 0.0001        |
| REACTOME REGULATION OF IFNA SIGNALING                               | -0.0127       | <0.0001           | 0.0002        |
| KEGG OOCYTE MEIOSIS                                                 | 0.0086        | <0.0001           | 0.0003        |
| REACTOME RECYCLING PATHWAY OF L1                                    | 0.0107        | <0.0001           | 0.0003        |
| BIOCARTA SPRY PATHWAY                                               | 0.0094        | <0.0001           | 0.0003        |
| KEGG FOCAL ADHESION                                                 | 0.0067        | <0.0001           | 0.0003        |
| BIOCARTA IL7 PATHWAY                                                | -0.0102       | <0.0001           | 0.0003        |
| PID REELINPATHWAY                                                   | 0.0082        | <0.0001           | 0.0003        |
| KEGG GAP JUNCTION                                                   | 0.0075        | <0.0001           | 0.0004        |
| PID ILK PATHWAY                                                     | 0.0105        | <0.0001           | 0.0005        |
| REACTOME SEMAPHORIN INTERACTIONS                                    | 0.0079        | <0.0001           | 0.0005        |
| PID NECTIN PATHWAY                                                  | <b>0.0055</b> | <b>&lt;0.0001</b> | <b>0.0006</b> |
| REACTOME SIGNALING BY RHO GTPASES                                   | 0.0061        | <0.0001           | 0.0006        |
| REACTOME PEPTIDE LIGAND BINDING RECEPTORS                           | -0.0108       | <0.0001           | 0.0006        |
| PID INTEGRIN A9B1 PATHWAY                                           | 0.0169        | <0.0001           | 0.0007        |
| REACTOME KINESINS                                                   | 0.0158        | <0.0001           | 0.0007        |
| KEGG SELENOAMINO ACID METABOLISM                                    | -0.0088       | <0.0001           | 0.0007        |
| PID INTEGRIN A4B1 PATHWAY                                           | 0.0100        | <0.0001           | 0.0008        |
| REACTOME PLATELET HOMEOSTASIS                                       | 0.0071        | <0.0001           | 0.0008        |
| <b>REACTOME GRB2 EVENTS IN ERBB2 SIGNALING</b>                      | 0.0118        | <0.0001           | 0.0008        |
| KEGG GLYCOSPHINGOLIPID BIOSYNTHESIS LACTO AND NEOLACTO SERIES       | 0.0116        | <0.0001           | 0.0008        |
| REACTOME G0 AND EARLY G1                                            | 0.0132        | <0.0001           | 0.0008        |
| BIOCARTA CELLCYCLE PATHWAY                                          | 0.0132        | <0.0001           | 0.0008        |
| PID AURORA A PATHWAY                                                | 0.0106        | <0.0001           | 0.0008        |
| PID S1P S1P1 PATHWAY                                                | 0.0075        | <0.0001           | 0.0009        |
| HALLMARK GLYCOLYSIS                                                 | 0.0063        | <0.0001           | 0.0009        |
| HALLMARK INTERFERON GAMMA RESPONSE                                  | -0.0225       | <0.0001           | 0.0009        |
| REACTOME P75NTR RECRUITS SIGNALLING COMPLEXES                       | 0.0093        | <0.0001           | 0.0009        |
| <b>PID ERBB NETWORK PATHWAY</b>                                     | <b>0.0147</b> | <b>&lt;0.0001</b> | <b>0.0009</b> |
| KEGG CALCIUM SIGNALING PATHWAY                                      | 0.0055        | <0.0001           | 0.0009        |
| REACTOME SIGNALING BY FGFR1 FUSION MUTANTS                          | -0.0083       | <0.0001           | 0.0009        |
| BIOCARTA NO1 PATHWAY                                                | 0.0086        | <0.0001           | 0.0009        |
| REACTOME METABOLISM OF POLYAMINES                                   | 0.0109        | <0.0001           | 0.0010        |
| KEGG AMINO SUGAR AND NUCLEOTIDE SUGAR METABOLISM                    | 0.0088        | <0.0001           | 0.0010        |
| REACTOME BOTULINUM NEUROTOXICITY                                    | 0.0156        | <0.0001           | 0.0010        |
| REACTOME REGULATION OF COMPLEMENT CASCADE                           | -0.0235       | <0.0001           | 0.0010        |

**Supplemental Table 3:** Top 50 gene sets predicted by GSEA between GFP (control) and IGF1R overexpressing RNA-sequencing data in HMECs. Distinguishing pathways are in red..

| Hallmark + canonical (C2) gene sets (Molecular Signatures Database) | logFC  | P.Value | adj.P.Val |
|---------------------------------------------------------------------|--------|---------|-----------|
| REACTOME AMINO ACID SYNTHESIS AND INTERCONVERSION TRANSAMINATION    | 0.064  | <0.0001 | <0.0001   |
| KEGG AMINO SUGAR AND NUCLEOTIDE SUGAR METABOLISM                    | 0.029  | <0.0001 | <0.0001   |
| REACTOME DIABETES PATHWAYS                                          | 0.027  | <0.0001 | <0.0001   |
| PID ATF2 PATHWAY                                                    | 0.028  | <0.0001 | <0.0001   |
| REACTOME UNFOLDED PROTEIN RESPONSE                                  | 0.036  | <0.0001 | <0.0001   |
| REACTOME IL 6 SIGNALING                                             | 0.045  | <0.0001 | <0.0001   |
| REACTOME ACTIVATION OF CHAPERONE GENES BY XBP1S                     | 0.030  | <0.0001 | <0.0001   |
| HALLMARK UNFOLDED PROTEIN RESPONSE                                  | 0.028  | <0.0001 | <0.0001   |
| REACTOME ACTIVATION OF GENES BY ATF4                                | 0.053  | <0.0001 | <0.0001   |
| PID_IL23PATHWAY                                                     | 0.029  | <0.0001 | <0.0001   |
| REACTOME PERK REGULATED GENE EXPRESSION                             | 0.050  | <0.0001 | <0.0001   |
| REACTOME SYNTHESIS OF SUBSTRATES IN N GLYCAN BIOSYTHESIS            | 0.044  | <0.0001 | <0.0001   |
| KEGG GLYCINE SERINE AND THREONINE METABOLISM                        | 0.034  | <0.0001 | <0.0001   |
| REACTOME ACTIVATION OF CHAPERONES BY ATF6 ALPHA                     | 0.028  | <0.0001 | <0.0001   |
| HALLMARK CHOLESTEROL HOMEOSTASIS                                    | 0.019  | <0.0001 | <0.0001   |
| KEGG ANTIGEN PROCESSING AND PRESENTATION                            | -0.017 | <0.0001 | <0.0001   |
| <b>HALLMARK MTORC1 SIGNALING</b>                                    | 0.019  | <0.0001 | <0.0001   |
| KEGG NITROGEN METABOLISM                                            | 0.022  | <0.0001 | <0.0001   |
| BIOCARTA CYTOKINE PATHWAY                                           | 0.050  | <0.0001 | <0.0001   |
| BIOCARTA GRANULOCYTES PATHWAY                                       | 0.057  | <0.0001 | <0.0001   |
| REACTOME SYNTHESIS SECRETION AND INACTIVATION OF GIP                | 0.022  | <0.0001 | <0.0001   |
| ST_STAT3_PATHWAY                                                    | 0.022  | <0.0001 | <0.0001   |
| KEGG PROTEIN EXPORT                                                 | 0.016  | <0.0001 | <0.0001   |
| KEGG ALANINE ASPARTATE AND GLUTAMATE METABOLISM                     | 0.022  | <0.0001 | <0.0001   |
| KEGG FRUCTOSE AND MANNOSE METABOLISM                                | 0.015  | <0.0001 | <0.0001   |
| REACTOME GLUCONEOGENESIS                                            | 0.016  | <0.0001 | <0.0001   |
| REACTOME BASIGIN INTERACTIONS                                       | 0.017  | <0.0001 | <0.0001   |
| PID REG GR PATHWAY                                                  | 0.012  | <0.0001 | <0.0001   |
| BIOCARTA ERYTH PATHWAY                                              | 0.028  | <0.0001 | <0.0001   |
| BIOCARTA IL10 PATHWAY                                               | 0.013  | <0.0001 | <0.0001   |
| REACTOME BIOSYNTHESIS OF THE N GLYCAN PRECURSOR DOLICHOL LIPID      | 0.029  | <0.0001 | <0.0001   |
| PID_AP1_PATHWAY                                                     | 0.019  | <0.0001 | <0.0001   |
| KEGG_NOD LIKE RECEPTOR SIGNALING PATHWAY                            | 0.011  | <0.0001 | <0.0001   |
| PID_NECTIN_PATHWAY                                                  | -0.007 | <0.0001 | <0.0001   |
| PID_P38ALPHABETADOWNSTREAMPATHWAY                                   | 0.016  | <0.0001 | <0.0001   |
| BIOCARTA_TEL_PATHWAY                                                | 0.009  | <0.0001 | <0.0001   |
| BIOCARTA LAIR PATHWAY                                               | 0.060  | <0.0001 | <0.0001   |
| <b>BIOCARTA IGF1MTOR PATHWAY</b>                                    | 0.014  | <0.0001 | <0.0001   |
| REACTOME_CIRCADIAN_CLOCK                                            | 0.008  | <0.0001 | <0.0001   |
| REACTOME_BMAL1_CLOCK_NPAS2_ACTIVATES_CIRCADIAN_EXPRESSION           | 0.010  | <0.0001 | <0.0001   |
| BIOCARTA_IL6_PATHWAY                                                | 0.012  | <0.0001 | <0.0001   |
| REACTOME_INCRETIN_SYNTHESIS_SECRETION_AND_INACTIVATION              | 0.014  | <0.0001 | <0.0001   |
| REACTOME_PLATELET_ADHESION_TO_EXPOSED_COLLAGEN                      | 0.016  | <0.0001 | <0.0001   |
| BIOCARTA_LYM_PATHWAY                                                | 0.047  | <0.0001 | <0.0001   |
| HALLMARK GLYCOLYSIS                                                 | 0.008  | <0.0001 | <0.0001   |
| PID_CDC42_REG_PATHWAY                                               | -0.010 | <0.0001 | <0.0001   |
| BIOCARTA_TALL1_PATHWAY                                              | -0.013 | <0.0001 | <0.0001   |
| REACTOME ASSOCIATION OF LICENSING FACTORS WITH THE PRE REPLIC...    | 0.024  | <0.0001 | <0.0001   |
| REACTOME CYTOSOLIC TRNA AMINOACYLATION                              | 0.018  | <0.0001 | <0.0001   |

**Supplemental Table 4:** Top 50 gene sets predicted by GSEA between GFP (control) and AKT1 overexpressing RNA-sequencing data in HMECs. Expected pathways are in red.

| Hallmark + canonical (C2) gene sets (Molecular Signatures Database) | logFC  | P.Value | adj.P.Val |
|---------------------------------------------------------------------|--------|---------|-----------|
| REACTOME CHEMOKINE RECEPTORS BIND CHEMOKINES                        | -0.028 | <0.0001 | <0.0001   |
| REACTOME REVERSIBLE HYDRATION OF CARBON DIOXIDE                     | 0.035  | <0.0001 | <0.0001   |
| BIOCARTA_RB_PATHWAY                                                 | -0.021 | <0.0001 | <0.0001   |
| KEGG_FRUCTOSE_AND_MANNOSE_METABOLISM                                | 0.015  | <0.0001 | <0.0001   |
| REACTOME GLYCOLYSIS                                                 | 0.011  | <0.0001 | <0.0001   |
| REACTOME SIGNALING BY BMP                                           | -0.015 | <0.0001 | <0.0001   |
| REACTOME DOWNREGULATION OF SMAD2 3 SMAD4 TRANSCRIPTIONAL...         | -0.015 | <0.0001 | <0.0001   |
| REACTOME TRANSCRIPTIONAL ACTIVITY OF SMAD2 SMAD3 SMA...             | -0.009 | <0.0001 | <0.0001   |
| PID SYNDECAN 2 PATHWAY                                              | -0.009 | <0.0001 | <0.0001   |
| PID NECTIN PATHWAY                                                  | -0.007 | <0.0001 | <0.0001   |
| REACTOME YAP1 AND WWTR1 TAZ STIMULATED GENE EXPRESSION              | -0.010 | <0.0001 | <0.0001   |
| REACTOME SIGNAL ATTENUATION                                         | -0.014 | <0.0001 | <0.0001   |
| REACTOME GLUCOSE METABOLISM                                         | 0.008  | <0.0001 | <0.0001   |
| PID_RHOA_PATHWAY                                                    | -0.008 | <0.0001 | <0.0001   |
| BIOCARTA_P53_PATHWAY                                                | -0.011 | <0.0001 | <0.0001   |
| PID_P53DOWNSTREAMPATHWAY                                            | -0.007 | <0.0001 | <0.0001   |
| REACTOME FORMATION OF TUBULIN FOLDING INTERMEDIATES BY CC...        | 0.007  | <0.0001 | 0.0001    |
| REACTOME RNA POL I RNA POL III AND MITOCHONDRIAL TRANSCRIPTION      | 0.008  | <0.0001 | 0.0001    |
| REACTOME PECAM1 INTERACTIONS                                        | -0.013 | <0.0001 | 0.0001    |
| HALLMARK_WNT_BETA_CATENIN_SIGNALING                                 | -0.008 | <0.0001 | 0.0001    |
| KEGG_PENTOSE_PHOSPHATE_PATHWAY                                      | 0.013  | <0.0001 | 0.0001    |
| BIOCARTA_CBL_PATHWAY                                                | -0.010 | <0.0001 | 0.0002    |
| BIOCARTA_AMI_PATHWAY                                                | -0.018 | <0.0001 | 0.0002    |
| HALLMARK_TNFA_SIGNALING_VIA_NFKB                                    | -0.011 | <0.0001 | 0.0002    |
| REACTOME REGULATION OF GENE EXPRESSION IN BETA CELLS                | 0.014  | <0.0001 | 0.0003    |
| REACTOME CELL EXTRACELLULAR MATRIX INTERACTIONS                     | -0.011 | <0.0001 | 0.0003    |
| REACTOME BILE SALT AND ORGANIC ANION SLC TRANSPORTERS               | 0.018  | <0.0001 | 0.0003    |
| REACTOME ZINC TRANSPORTERS                                          | 0.011  | <0.0001 | 0.0003    |
| BIOCARTA_NTHI_PATHWAY                                               | -0.011 | <0.0001 | 0.0004    |
| PID_REG_GR_PATHWAY                                                  | -0.008 | <0.0001 | 0.0004    |
| KEGG_HOMOLOGOUS_RECOMBINATION                                       | -0.011 | <0.0001 | 0.0004    |
| PID_HIF1_TFPATHWAY                                                  | 0.010  | <0.0001 | 0.0004    |
| REACTOME GLUCONEOGENESIS                                            | 0.010  | <0.0001 | 0.0004    |
| BIOCARTA_DNAFRAGMENT_PATHWAY                                        | -0.021 | <0.0001 | 0.0004    |
| BIOCARTA_DC_PATHWAY                                                 | -0.033 | <0.0001 | 0.0004    |
| BIOCARTA_ECM_PATHWAY                                                | -0.007 | <0.0001 | 0.0004    |
| REACTOME RNA POL III TRANSCRIPTION                                  | 0.009  | <0.0001 | 0.0004    |
| <b>REACTOME_DOWNREGULATION_OF_ERBB2_ERBB3_SIGNALING</b>             | 0.011  | <0.0001 | 0.0004    |
| REACTOME P75NTR RECRUITS SIGNALLING COMPLEXES                       | -0.010 | <0.0001 | 0.0004    |
| BIOCARTA GRANULOCYTES_PATHWAY                                       | -0.030 | <0.0001 | 0.0005    |
| BIOCARTA_ARAP_PATHWAY                                               | -0.011 | <0.0001 | 0.0005    |
| REACTOME FACTORS INVOLVED IN MEGAKARYOCYTE DEVELOPMENT...           | -0.008 | <0.0001 | 0.0005    |
| REACTOME REGULATION OF RHEB GTPASE ACTIVITY BY AMPK                 | -0.014 | <0.0001 | 0.0005    |
| HALLMARK_IL6_JAK_STAT3_SIGNALING                                    | -0.008 | <0.0001 | 0.0005    |
| PID_TOLL_ENDOGENOUS_PATHWAY                                         | -0.012 | <0.0001 | 0.0006    |
| REACTOME_HS_GAG_BIOSYNTHESIS                                        | -0.007 | <0.0001 | 0.0006    |
| REACTOME RECYCLING_PATHWAY_OF_L1                                    | -0.008 | <0.0001 | 0.0006    |
| PID_FAK_PATHWAY                                                     | -0.008 | <0.0001 | 0.0006    |
| BIOCARTA_ARENRF2_PATHWAY                                            | -0.013 | <0.0001 | 0.0007    |

**Supplemental Table 5:** Top 50 gene sets predicted by GSEA between GFP (control) and BAD overexpressing RNA-sequencing data in HMECs Expected pathways are in red.

| Hallmark + canonical (C2) gene sets (Molecular Signatures Database) | logFC  | P.Value | adj.P.Val |
|---------------------------------------------------------------------|--------|---------|-----------|
| REACTOME_CHEMOKINE_RECEPTORS_BIND_CHEMOKINES                        | -0.055 | <0.0001 | <0.0001   |
| KEGG_ANTIGEN_PROCESSING_AND_PRESENTATION                            | -0.031 | <0.0001 | <0.0001   |
| BIOCARTA_INFLAM_PATHWAY                                             | -0.043 | <0.0001 | <0.0001   |
| BIOCARTA_NTHI_PATHWAY                                               | -0.030 | <0.0001 | <0.0001   |
| <b>PID_FRA_PATHWAY</b>                                              | -0.030 | <0.0001 | <0.0001   |
| PID_SYNDECAN_2_PATHWAY                                              | -0.017 | <0.0001 | <0.0001   |
| PID_ATF2_PATHWAY                                                    | -0.020 | <0.0001 | <0.0001   |
| BIOCARTA_P53HYPOXIA_PATHWAY                                         | -0.019 | <0.0001 | <0.0001   |
| BIOCARTA_TID_PATHWAY                                                | -0.029 | <0.0001 | <0.0001   |
| PID_SYNDECAN_3_PATHWAY                                              | -0.033 | <0.0001 | <0.0001   |
| BIOCARTA_PPARA_PATHWAY                                              | -0.017 | <0.0001 | <0.0001   |
| HALLMARK_TNFA_SIGNALING_VIA_NFKB                                    | -0.026 | <0.0001 | <0.0001   |
| PID_REG_GR_PATHWAY                                                  | -0.017 | <0.0001 | <0.0001   |
| BIOCARTA_IL7_PATHWAY                                                | -0.020 | <0.0001 | <0.0001   |
| BIOCARTA_FREE_PATHWAY                                               | -0.032 | <0.0001 | <0.0001   |
| BIOCARTA_IL10_PATHWAY                                               | -0.019 | <0.0001 | <0.0001   |
| PID_AP1_PATHWAY                                                     | -0.027 | <0.0001 | <0.0001   |
| REACTOME_PEPTIDE_LIGAND_BINDING_RECEPTORS                           | -0.020 | <0.0001 | <0.0001   |
| BIOCARTA_STEM_PATHWAY                                               | -0.078 | <0.0001 | <0.0001   |
| BIOCARTA_IL17_PATHWAY                                               | -0.061 | <0.0001 | <0.0001   |
| KEGG_CYTOKINE_CYTOKINE_RECEPTOR_INTERACTION                         | -0.018 | <0.0001 | <0.0001   |
| PID_RHOA_PATHWAY                                                    | -0.013 | <0.0001 | <0.0001   |
| PID_IL8CXCR1_PATHWAY                                                | -0.023 | <0.0001 | <0.0001   |
| BIOCARTA_ARENRF2_PATHWAY                                            | -0.028 | <0.0001 | <0.0001   |
| BIOCARTA_GNANULOCYTES_PATHWAY                                       | -0.061 | <0.0001 | <0.0001   |
| PID_NFAT_TFPATHWAY                                                  | -0.030 | <0.0001 | <0.0001   |
| BIOCARTA_CYTOKINE_PATHWAY                                           | -0.053 | <0.0001 | <0.0001   |
| BIOCARTA_ERYTH_PATHWAY                                              | -0.028 | <0.0001 | <0.0001   |
| BILD_HRAS_ONCOGENIC_SIGNATURE                                       | -0.021 | <0.0001 | <0.0001   |
| PID_IL23PATHWAY                                                     | -0.015 | <0.0001 | <0.0001   |
| REACTOME_RNA_POL_III_CHAIN_ELONGATION                               | 0.023  | <0.0001 | <0.0001   |
| KEGG_RNA_POLYMERASE                                                 | 0.020  | <0.0001 | <0.0001   |
| KEGG_EPITHELIAL_CELL_SIGNALING_IN_HELICOBACTER_PYLORI_INFECTION     | -0.011 | <0.0001 | <0.0001   |
| REACTOME_RNA_POL_III_TRANSCRIPTION_INITIATION_FROM_TYPE_3           | 0.019  | <0.0001 | <0.0001   |
| BIOCARTA_IL22BP_PATHWAY                                             | -0.022 | <0.0001 | <0.0001   |
| BIOCARTA_ETS_PATHWAY                                                | -0.022 | <0.0001 | <0.0001   |
| BIOCARTA_CHEMICAL_PATHWAY                                           | 0.016  | <0.0001 | <0.0001   |
| REACTOME_RNA_POL_III_TRANSCRIPTION_TERMINATION                      | 0.020  | <0.0001 | <0.0001   |
| KEGG_NOD_LIKE_RECEPTOR_SIGNALING_PATHWAY                            | -0.017 | <0.0001 | <0.0001   |
| KEGG_PRION_DISEASES                                                 | -0.020 | <0.0001 | <0.0001   |
| REACTOME_G_ALPHA_I_SIGNALLING_EVENTS                                | -0.013 | <0.0001 | <0.0001   |
| KEGG_TOLL_LIKE_RECEPTOR_SIGNALING_PATHWAY                           | -0.013 | <0.0001 | <0.0001   |
| PID_TAP63PATHWAY                                                    | -0.010 | <0.0001 | <0.0001   |
| PID_P53DOWNSTREAMPATHWAY                                            | -0.009 | <0.0001 | <0.0001   |
| REACTOME_IL_6_SIGNALING                                             | -0.020 | <0.0001 | <0.0001   |
| HALLMARK_IL6_JAK_STAT3_SIGNALING                                    | -0.013 | <0.0001 | <0.0001   |
| KEGG_ENDOCYTOSIS                                                    | -0.014 | <0.0001 | <0.0001   |
| PID_FGF_PATHWAY                                                     | -0.013 | <0.0001 | <0.0001   |
| KEGG_PYRIMIDINE_METABOLISM                                          | 0.014  | <0.0001 | <0.0001   |

**Supplemental Table 6.** Top 50 gene sets predicted by GSVA between GFP (control) and EGFR overexpressing RNA-sequencing data in HMECs. Expected pathways are in red.

| Hallmark + canonical (C2) gene sets (Molecular Signatures Database) | logFC | P.Value | adj.P.Val |
|---------------------------------------------------------------------|-------|---------|-----------|
| REACTOME_UNWINDING_OF_DNA                                           | 0.056 | <0.0001 | <0.0001   |
| REACTOME_DNA_STRAND_ELONGATION                                      | 0.044 | <0.0001 | <0.0001   |
| REACTOME_ACTIVATION_OF_THE_PRE_REPLICATIVE_COMPLEX                  | 0.045 | <0.0001 | <0.0001   |
| REACTOME_CYCLIN_A_B1_ASSOCIATED_EVENTS_DURING_G2_M_TRANS...         | 0.027 | <0.0001 | <0.0001   |
| KEGG_DNA_REPLICATION                                                | 0.033 | <0.0001 | <0.0001   |
| PID_FANCONI_PATHWAY                                                 | 0.026 | <0.0001 | <0.0001   |
| REACTOME_G1_S_SPECIFIC_TRANSCRIPTION                                | 0.039 | <0.0001 | <0.0001   |
| REACTOME_ACTIVATION_OF_ATR_IN_RESPONSE_TO_REPLICATION_STRE..        | 0.041 | <0.0001 | <0.0001   |
| REACTOME_G2_M_CHECKPOINTS                                           | 0.038 | <0.0001 | <0.0001   |
| HALLMARK_E2F_TARGETS                                                | 0.025 | <0.0001 | <0.0001   |
| PID_FOXM1PATHWAY                                                    | 0.019 | <0.0001 | <0.0001   |
| REACTOME_E2F_MEDIATED_REGULATION_OF_DNA_REPLICATION                 | 0.030 | <0.0001 | <0.0001   |
| PID_ATR_PATHWAY                                                     | 0.026 | <0.0001 | <0.0001   |
| BIOCARTA_MCM_PATHWAY                                                | 0.032 | <0.0001 | <0.0001   |
| REACTOME_MITOTIC_PROMETAPHASE                                       | 0.025 | <0.0001 | <0.0001   |
| REACTOME_DNA_REPLICATION                                            | 0.023 | <0.0001 | <0.0001   |
| KEGG_CELL_CYCLE                                                     | 0.017 | <0.0001 | <0.0001   |
| HALLMARK_G2M_CHECKPOINT                                             | 0.020 | <0.0001 | <0.0001   |
| REACTOME_G0_AND_EARLY_G1                                            | 0.027 | <0.0001 | <0.0001   |
| REACTOME_POL_SWITCHING                                              | 0.037 | <0.0001 | <0.0001   |
| REACTOME_MITOTIC_M_M_G1_PHASES                                      | 0.022 | <0.0001 | <0.0001   |
| REACTOME_REPAIR_SYNTHESIS_FOR_GAP_FILLING_BY_DNA_POL_IN_TC...       | 0.033 | <0.0001 | <0.0001   |
| REACTOME_LAGGING_STRAND_SYNTHESIS                                   | 0.036 | <0.0001 | <0.0001   |
| REACTOME_CELL_CYCLE_MITOTIC                                         | 0.019 | <0.0001 | <0.0001   |
| REACTOME_EXTENSION_OF_TELOMERES                                     | 0.030 | <0.0001 | <0.0001   |
| KEGG_MISMATCH_REPAIR                                                | 0.028 | <0.0001 | <0.0001   |
| REACTOME_SYNTHESIS_OF_DNA                                           | 0.020 | <0.0001 | <0.0001   |
| REACTOME_INHIBITION_OF_REPLICATION_INITIATION_OF_DAMAGED_DNA..      | 0.024 | <0.0001 | <0.0001   |
| BIOCARTA_MCM_PATHWAY                                                | 0.022 | <0.0001 | <0.0001   |
| REACTOME_CDC6_ASSOCIATION_WITH_THE_ORC_ORIGIN_COMPLEX               | 0.036 | <0.0001 | <0.0001   |
| PID_AURORA_B_PATHWAY                                                | 0.021 | <0.0001 | <0.0001   |
| BIOCARTA_CELLCYCLE_PATHWAY                                          | 0.016 | <0.0001 | <0.0001   |
| PID_PLK1_PATHWAY                                                    | 0.019 | <0.0001 | <0.0001   |
| REACTOME_S_PHASE                                                    | 0.020 | <0.0001 | <0.0001   |
| REACTOME_CELL_CYCLE                                                 | 0.017 | <0.0001 | <0.0001   |
| REACTOME_HOMOLOGOUS_RECOMBINATION_REPAIR_OF_REPLICATION...          | 0.025 | <0.0001 | <0.0001   |
| PID_E2F_PATHWAY                                                     | 0.015 | <0.0001 | <0.0001   |
| REACTOME_MITOTIC_G1_G1_S_PHASES                                     | 0.017 | <0.0001 | <0.0001   |
| REACTOME_M_G1_TRANSITION                                            | 0.019 | <0.0001 | <0.0001   |
| REACTOME_KINESINS                                                   | 0.019 | <0.0001 | <0.0001   |
| REACTOME_G1_S_TRANSITION                                            | 0.019 | <0.0001 | <0.0001   |
| REACTOME_CHROMOSOME_MAINTENANCE                                     | 0.020 | <0.0001 | <0.0001   |
| REACTOME_PROCESSIVE_SYNTHESIS_ON_THE_LAGGING_STRAND                 | 0.031 | <0.0001 | <0.0001   |
| REACTOME_E2F_ENABLED_INHIBITION_OF_PRE_REPLICATION_COMPLEX...       | 0.029 | <0.0001 | <0.0001   |
| KEGG_HOMOLOGOUS_RECOMBINATION                                       | 0.019 | <0.0001 | <0.0001   |
| SA_REG_CASCADE_OF_CYCLIN_EXPR                                       | 0.024 | <0.0001 | <0.0001   |
| PID_BARD1PATHWAY                                                    | 0.017 | <0.0001 | <0.0001   |
| REACTOME_ASSOCIATION_OF_LICENSING_FACTORS_WITH_THE_PRE_REP...       | 0.025 | <0.0001 | <0.0001   |
| <b>PID_ERBB_NETWORK_PATHWAY</b>                                     | 0.020 | <0.0001 | <0.0001   |

**Supplemental Table 7.** Top 50 gene sets predicted by GSVA between GFP (control) and KRAS(G12V) overexpressing RNA-sequencing data in HMECs. Expected pathways are in red.

| Hallmark + canonical (C2) gene sets (Molecular Signatures Database) | logFC  | P.Value | adj.P.Val |
|---------------------------------------------------------------------|--------|---------|-----------|
| <b>REACTOME_RAF_MAP_KINASE_CASCADE</b>                              | 0.037  | <0.0001 | <0.0001   |
| <b>PID_TCRRASPATHWAY</b>                                            | 0.044  | <0.0001 | <0.0001   |
| <b>REACTOME_SHC1_EVENTS_IN_EGFR_SIGNALING</b>                       | 0.023  | <0.0001 | <0.0001   |
| <b>REACTOME_SHC_MEDIATED_SIGNALING</b>                              | 0.023  | <0.0001 | <0.0001   |
| <b>REACTOME_GRB2_EVENTS_IN_ERBB2_SIGNALING</b>                      | 0.032  | <0.0001 | <0.0001   |
| <b>REACTOME_SHC1_EVENTS_IN_ERBB4_SIGNALING</b>                      | 0.034  | <0.0001 | <0.0001   |
| <b>REACTOME_SHC_RELATED_EVENTS</b>                                  | 0.022  | <0.0001 | <0.0001   |
| BIOCARTA_P53HYPOXIA_PATHWAY                                         | -0.030 | <0.0001 | <0.0001   |
| <b>REACTOME_P38MAPK_EVENTS</b>                                      | 0.031  | <0.0001 | <0.0001   |
| <b>REACTOME_SOS_MEDIATED_SIGNALING</b>                              | 0.026  | <0.0001 | <0.0001   |
| <b>PID_RAS_PATHWAY</b>                                              | 0.020  | <0.0001 | <0.0001   |
| <b>BILD_HRAS_ONCOGENIC_SIGNATURE</b>                                | 0.019  | <0.0001 | <0.0001   |
| KEGG_ANTIGEN_PROCESSING_AND_PRESENTATION                            | -0.037 | <0.0001 | <0.0001   |
| REACTOME_IL7_SIGNALING                                              | -0.030 | <0.0001 | <0.0001   |
| <b>PID_ERBB_NETWORK_PATHWAY</b>                                     | 0.030  | <0.0001 | <0.0001   |
| <b>REACTOME_SIGNALING_TO_P38_VIA_RIT_AND_RIN</b>                    | 0.022  | <0.0001 | <0.0001   |
| BIOCARTA_IL7_PATHWAY                                                | -0.022 | <0.0001 | <0.0001   |
| KEGG_ALDOSTERONE_REGULATED_SODIUM_REABSORPTION                      | 0.018  | <0.0001 | <0.0001   |
| BIOCARTA_TID_PATHWAY                                                | -0.038 | <0.0001 | <0.0001   |
| <b>PID_MAPKTRKPATHWAY</b>                                           | 0.022  | <0.0001 | <0.0001   |
| PID_CD8TCRDOWNSTREAMPATHWAY                                         | 0.018  | <0.0001 | <0.0001   |
| HALLMARK_ANGIOGENESIS                                               | 0.016  | <0.0001 | <0.0001   |
| REACTOME_ARMS_MEDIATED_ACTIVATION                                   | 0.017  | <0.0001 | <0.0001   |
| <b>BIOCARTA_SPRY_PATHWAY</b>                                        | 0.014  | <0.0001 | <0.0001   |
| REACTOME_TIE2_SIGNALING                                             | 0.025  | <0.0001 | <0.0001   |
| BIOCARTA_PPARA_PATHWAY                                              | -0.017 | <0.0001 | <0.0001   |
| <b>HALLMARK_KRAS_SIGNALING_UP</b>                                   | 0.014  | <0.0001 | <0.0001   |
| REACTOME_NUCLEOTIDE_LIKE_PURINERGIC_RECEPTORS                       | 0.029  | <0.0001 | <0.0001   |
| HALLMARK_APICAL_SURFACE                                             | 0.020  | <0.0001 | <0.0001   |
| KEGG_ENDOCYTOSIS                                                    | -0.010 | <0.0001 | <0.0001   |
| KEGG_SPLICEOSOME                                                    | -0.018 | <0.0001 | <0.0001   |
| <b>REACTOME_SIGNALING_BY_CONSTITUTIVELY_ACTIVE_EGFR</b>             | 0.015  | <0.0001 | <0.0001   |
| REACTOME_HYALURONAN_METABOLISM                                      | 0.019  | <0.0001 | <0.0001   |
| PID_ER_NONGENOMIC_PATHWAY                                           | 0.012  | <0.0001 | <0.0001   |
| BIOCARTA_MAL_PATHWAY                                                | 0.019  | <0.0001 | <0.0001   |
| <b>REACTOME_SIGNALING_TO_RAS</b>                                    | 0.013  | <0.0001 | <0.0001   |
| HALLMARK_IL2_STAT5_SIGNALING                                        | 0.010  | <0.0001 | <0.0001   |
| BIOCARTA_TEL_PATHWAY                                                | 0.015  | <0.0001 | <0.0001   |
| REACTOME_TRIGLYCERIDE_BIOSYNTHESIS                                  | 0.011  | <0.0001 | <0.0001   |
| <b>PID_P38ALPHABETAPATHWAY</b>                                      | -0.011 | <0.0001 | <0.0001   |
| <b>REACTOME_SHC_MEDIATED_CASCADE</b>                                | 0.022  | <0.0001 | <0.0001   |
| BIOCARTA_EPONFKB_PATHWAY                                            | -0.013 | <0.0001 | <0.0001   |
| BIOCARTA_FIBRINOLYSIS_PATHWAY                                       | 0.037  | <0.0001 | <0.0001   |
| <b>ST_JNK_MAPK_PATHWAY</b>                                          | -0.010 | <0.0001 | <0.0001   |
| <b>REACTOME_PROLONGED_ERK_ACTIVATION_EVENTS</b>                     | 0.013  | <0.0001 | <0.0001   |
| <b>REACTOME_GASTRIN_CREB_SIGNALING_PATHWAY_VIA_PKC_AND_MAPK</b>     | 0.009  | <0.0001 | <0.0001   |
| <b>PID_ERBB2ERBB3PATHWAY</b>                                        | 0.008  | <0.0001 | <0.0001   |
| BIOCARTA_LONGEVITY_PATHWAY                                          | -0.011 | <0.0001 | <0.0001   |



**Supplemental Table 8.** Top 50 gene sets predicted by GSEA between GFP (control) and RAF1 overexpressing RNA-sequencing data in HMECs. Expected pathways are in red.

| Hallmark + canonical (C2) gene sets (Molecular Signatures Database) | logFC  | P.Value | adj.P.Val |
|---------------------------------------------------------------------|--------|---------|-----------|
| <b>BIOCARTA_SPRY_PATHWAY</b>                                        | 0.027  | <0.0001 | <0.0001   |
| KEGG ANTIGEN PROCESSING AND PRESENTATION                            | -0.029 | <0.0001 | <0.0001   |
| <b>HALLMARK_KRAS_SIGNALING_UP</b>                                   | 0.021  | <0.0001 | <0.0001   |
| PID REELINPATHWAY                                                   | 0.018  | <0.0001 | <0.0001   |
| <b>BIOCARTA_CBL_PATHWAY</b>                                         | 0.020  | <0.0001 | <0.0001   |
| REACTOME REVERSIBLE HYDRATION OF CARBON DIOXIDE                     | 0.034  | <0.0001 | <0.0001   |
| BIOCARTA_FIBRINOLYSIS_PATHWAY                                       | 0.051  | <0.0001 | <0.0001   |
| PID_VEGFR1_PATHWAY                                                  | 0.014  | <0.0001 | <0.0001   |
| PID_INTEGRIN_A9B1_PATHWAY                                           | 0.037  | <0.0001 | <0.0001   |
| BIOCARTA_SPPA_PATHWAY                                               | 0.021  | <0.0001 | <0.0001   |
| BIOCARTA_IL10_PATHWAY                                               | -0.020 | <0.0001 | <0.0001   |
| PID_BMPPATHWAY                                                      | 0.022  | <0.0001 | <0.0001   |
| SIG_IL4RECEPTOR_IN_B_LYPHOCYTES                                     | 0.020  | <0.0001 | <0.0001   |
| BIOCARTA_P53HYPOXIA_PATHWAY                                         | -0.016 | <0.0001 | <0.0001   |
| <b>PID_ERBB1_INTERNALIZATION_PATHWAY</b>                            | 0.021  | <0.0001 | <0.0001   |
| HALLMARK_TGF_BETA_SIGNALING                                         | 0.017  | <0.0001 | <0.0001   |
| PID_IGF1_PATHWAY                                                    | 0.015  | <0.0001 | <0.0001   |
| SIG_PIP3_SIGNALING_IN_B_LYMPHOCYTES                                 | 0.013  | <0.0001 | <0.0001   |
| BIOCARTA_AKAP13_PATHWAY                                             | 0.026  | <0.0001 | <0.0001   |
| PID_TGFBRPATHWAY                                                    | 0.012  | <0.0001 | <0.0001   |
| PID_FGF_PATHWAY                                                     | 0.012  | <0.0001 | <0.0001   |
| REACTOME_DOWNREGULATION_OF_SMAD2_3_SMAD4_TRANS..                    | 0.015  | <0.0001 | <0.0001   |
| HALLMARK_IL2_STAT5_SIGNALING                                        | 0.011  | <0.0001 | <0.0001   |
| BIOCARTA_IL22BP_PATHWAY                                             | -0.019 | <0.0001 | <0.0001   |
| KEGG_SPLICEOSOME                                                    | -0.015 | <0.0001 | <0.0001   |
| SIG_BCR_SIGNALING_PATHWAY                                           | 0.013  | <0.0001 | <0.0001   |
| REACTOME_SIGNAL_TRANSDUCTION_BY_L1                                  | 0.011  | <0.0001 | <0.0001   |
| KEGG_ASCORBATE_AND_ALDARATE_METABOLISM                              | -0.019 | <0.0001 | <0.0001   |
| REACTOME_RECYCLING_PATHWAY_OF_L1                                    | 0.014  | <0.0001 | <0.0001   |
| REACTOME_SIGNALING_BY_TGF_BETA_RECEPTOR_COMPLEX                     | 0.009  | <0.0001 | <0.0001   |
| REACTOME_DOWNREGULATION_OF_TGF_BETA_RECEPTOR                        | 0.013  | <0.0001 | <0.0001   |
| KEGG_NATURAL_KILLER_CELL_MEDIATED_CYTOTOXICITY                      | 0.009  | <0.0001 | <0.0001   |
| KEGG_JAK_STAT_SIGNALING_PATHWAY                                     | 0.011  | <0.0001 | <0.0001   |
| REACTOME_SIGNALING_BY_BMP                                           | 0.017  | <0.0001 | <0.0001   |
| REACTOME_TRANSCRIPTIONAL_ACTIVITY_OF_SMAD2_SMAD3..                  | 0.010  | <0.0001 | <0.0001   |
| REACTOME_RORA_ACTIVATES_CIRCADIAN_EXPRESSION                        | 0.012  | <0.0001 | <0.0001   |
| PID_EPHRINBREVPATHWAY                                               | 0.015  | <0.0001 | <0.0001   |
| REACTOME_IL_7_SIGNALING                                             | -0.016 | <0.0001 | <0.0001   |
| KEGG_VASCULAR_SMOOTH_MUSCLE_CONTRACTION                             | 0.010  | <0.0001 | <0.0001   |
| REACTOME_G_ALPHA1213_SIGNALLING_EVENTS                              | 0.013  | <0.0001 | <0.0001   |
| <b>PID_P38_MK2PATHWAY</b>                                           | 0.013  | <0.0001 | <0.0001   |
| REACTOME_GAP_JUNCTION_TRAFFICKING                                   | 0.016  | <0.0001 | <0.0001   |
| KEGG_FATTY_ACID_METABOLISM                                          | -0.012 | <0.0001 | <0.0001   |
| KEGG_PRION_DISEASES                                                 | -0.018 | <0.0001 | <0.0001   |
| REACTOME_TGF_BETA_RECEPTOR_SIGNALING_ACTIVATES_SMADS                | 0.013  | <0.0001 | <0.0001   |
| PID_ARF6_PATHWAY                                                    | 0.011  | <0.0001 | <0.0001   |
| BIOCARTA_ECM_PATHWAY                                                | 0.010  | <0.0001 | <0.0001   |
| <b>BILD_HRAS_ONCOGENIC_SIGNATURE</b>                                | 0.015  | <0.0001 | <0.0001   |
| PID_CDC42_REG_PATHWAY                                               | 0.012  | <0.0001 | <0.0001   |



**Supplemental Table 9:** Clinical and intrinsic subtype variation within the growth and survival phenotypes in ICBP breast cancer cell lines

| <b>Subtypes</b> | <b>Num. in survival phenotype (N=29)</b> | <b>Percentage of total survival phenotype samples</b> | <b>Num. in growth phenotype (N=26)</b> | <b>Percentage of total growth phenotype samples</b> |
|-----------------|------------------------------------------|-------------------------------------------------------|----------------------------------------|-----------------------------------------------------|
| ER Positive     | 17                                       | 58.62%                                                | 1                                      | 3.84%                                               |
| ER Negative     | 10                                       | 34.48%                                                | 22                                     | 84.62%                                              |
| PR Positive     | 7                                        | 24.14%                                                | 0                                      | 0%                                                  |
| PR Negative     | 20                                       | 68.96%                                                | 21                                     | 80.76%                                              |
| HER2 Positive   | 15                                       | 51.72%                                                | 2                                      | 7.69%                                               |
| HER2 Negative   | 14                                       | 48.28%                                                | 19                                     | 73.07%                                              |
| Basal           | 1                                        | 3.45%                                                 | 9                                      | 34.62%                                              |
| Claudin-low     | 0                                        | 0%                                                    | 5                                      | 19.23%                                              |
| HER2-Basal      | 1                                        | 3.45%                                                 | 6                                      | 23.08%                                              |
| HER2-Luminal    | 14                                       | 48.28%                                                | 0                                      | 0%                                                  |
| Luminal         | 11                                       | 37.93%                                                | 0                                      | 0%                                                  |
| Normal-like     | 0                                        | 0%                                                    | 5                                      | 19.23%                                              |

**Supplemental Table 10:** Clinical and intrinsic subtype variation within the growth and survival phenotypes in TCGA tumor data.

| <b>Subtypes</b> | <b>Num. in survival phenotype (N=596)</b> | <b>Percentage of total survival phenotype samples</b> | <b>Num. in growth phenotype (N=523)</b> | <b>Percentage of total growth phenotype samples</b> |
|-----------------|-------------------------------------------|-------------------------------------------------------|-----------------------------------------|-----------------------------------------------------|
| ER Positive     | 505                                       | 84.73%                                                | 280                                     | 53.54%                                              |
| ER Negative     | 33                                        | 5.54%                                                 | 197                                     | 37.67%                                              |
| PR Positive     | 435                                       | 72.99%                                                | 245                                     | 46.85%                                              |
| PR Negative     | 102                                       | 17.11%                                                | 230                                     | 43.98%                                              |
| HER2 Positive   | 108                                       | 18.12%                                                | 54                                      | 10.33%                                              |
| HER2 Negative   | 251                                       | 42.11%                                                | 295                                     | 56.41%                                              |
| Basal           | 2                                         | 0.34%                                                 | 93                                      | 17.78%                                              |
| HER2            | 41                                        | 6.88%                                                 | 16                                      | 3.06%                                               |
| LumA            | 158                                       | 26.51%                                                | 73                                      | 13.96%                                              |
| LumB            | 106                                       | 17.79%                                                | 21                                      | 4.02%                                               |
| Normal          | 2                                         | 0.34%                                                 | 5                                       | 0.96%                                               |

**Supplemental Table 11:** Comparing GFRN subtypes, intrinsic subtypes (PAM50), and clinical subtypes (ER, ER, and HER2 status) in terms of contribution to principle components 1 through 5 from TCGA RNA-sequencing breast cancer data. Contributed variability from linear models are represented as  $R^2$  values (0-1).

| PC | ER ( $R^2$ )   | ER + GFRN subgroups ( $R^2$ ) | ER + PAM50 ( $R^2$ )   |                                     |
|----|----------------|-------------------------------|------------------------|-------------------------------------|
| 1  | 0.087          | 0.188                         | 0.131                  |                                     |
| 2  | 0.561          | 0.696                         | 0.747                  |                                     |
| 3  | 0.052          | 0.398                         | 0.254                  |                                     |
| 4  | 0.029          | 0.279                         | 0.078                  |                                     |
| 5  | 0.038          | 0.175                         | 0.216                  |                                     |
|    |                |                               |                        |                                     |
| PC | PR             | PR + GFRN subgroups           | PR + PAM50             |                                     |
| 1  | 0.060          | 0.156                         | 0.124                  |                                     |
| 2  | 0.407          | 0.647                         | 0.736                  |                                     |
| 3  | 0.059          | 0.393                         | 0.253                  |                                     |
| 4  | 0.004          | 0.282                         | 0.083                  |                                     |
| 5  | 0.027          | 0.173                         | 0.216                  |                                     |
|    |                |                               |                        |                                     |
| PC | HER2           | HER2 + GFRN subgroups         | HER2 + PAM50           |                                     |
| 1  | 0.011          | 0.129                         | 0.125                  |                                     |
| 2  | 0.000          | 0.509                         | 0.725                  |                                     |
| 3  | 0.033          | 0.393                         | 0.257                  |                                     |
| 4  | 0.021          | 0.279                         | 0.082                  |                                     |
| 5  | 0.023          | 0.207                         | 0.224                  |                                     |
|    |                |                               |                        |                                     |
| PC | ER/PR/HER2     | ER/PR/HER2 + GFRN subgroups   | ER/PR/HER2 + PAM50     |                                     |
| 1  | 0.098          | 0.191                         | 0.133                  |                                     |
| 2  | 0.598          | 0.726                         | 0.751                  |                                     |
| 3  | 0.091          | 0.404                         | 0.263                  |                                     |
| 4  | 0.054          | 0.282                         | 0.089                  |                                     |
| 5  | 0.068          | 0.213                         | 0.224                  |                                     |
|    |                |                               |                        |                                     |
| PC | GFRN subgroups | PAM50                         | GFRN subgroups + PAM50 | ER/PR/HER2 + PAM50 + GFRN subgroups |
| 1  | 0.124427       | 0.1229359                     | 0.2100966              | 0.220723                            |
| 2  | 0.4922497      | 0.7243437                     | 0.7920581              | 0.8151674                           |
| 3  | 0.3845233      | 0.2489111                     | 0.4695138              | 0.4784226                           |
| 4  | 0.2788131      | 0.0777884                     | 0.2880172              | 0.2936144                           |
| 5  | 0.1725182      | 0.2159571                     | 0.2904661              | 0.3047475                           |

**Supplemental Table 12:** Spearman correlations between principal component values for principal components 1-5 from TCGA BRCA gene expression data and pathway activation estimates for each oncogenic signature in TCGA BRCA gene expression data (\* p-value<0.0001).

|              | <b>PC 1</b> | <b>PC 2</b> | <b>PC 3</b> | <b>PC 4</b> | <b>PC 5</b> |
|--------------|-------------|-------------|-------------|-------------|-------------|
| <b>AKT</b>   | 0.047       | -0.572*     | 0.402*      | 0.474*      | 0.084       |
| <b>HER2</b>  | -0.076      | -0.334*     | 0.366*      | 0.347*      | -0.094      |
| <b>IGF1R</b> | -0.284*     | -0.824*     | 0.249*      | 0.358*      | 0.044       |
| <b>EGFR</b>  | -0.255*     | 0.439*      | -0.538*     | -0.596*     | -0.266*     |
| <b>RAF1</b>  | -0.357*     | 0.639*      | -0.434*     | -0.636*     | -0.347*     |
| <b>KRAS</b>  | 0.108       | 0.762*      | -0.399*     | -0.443*     | -0.065      |
| <b>BAD</b>   | 0.401*      | 0.452*      | 0.524*      | -0.139*     | 0.364*      |

**Supplemental Table 13:** List of cancer drugs and corresponding p-values, where GFRN phenotypes, ER, PR, or HER2 status could significantly (p-value<0.05) distinguish drug response in ICBP cell lines.

| GFRN phenotype drugs | P.value | ER based drugs   | P.value | PR based drugs   | P.value | HER2 based drugs | P.value |
|----------------------|---------|------------------|---------|------------------|---------|------------------|---------|
| AKT1/2 Inhibitor     | <0.0001 | AG1478           | 0.014   | AKT1/2 Inhibitor | 0.028   | AG1478           | 0.001   |
| AZD6244              | 0.007   | AKT1/2 Inhibitor | 0.034   | Triciribine      | 0.001   | BEZ235           | 0.024   |
| CGC.11047            | 0.006   | Bortezomib       | 0.041   | AS.252424        | 0.029   | BIBW2992         | 0.000   |
| Erlotinib            | 0.012   | CGC.11047        | 0.027   | AZD6244          | 0.000   | CPT.11           | 0.040   |
| Etoposide            | 0.034   | Erlotinib        | 0.001   | GSK1070916       | 0.047   | Everolimus       | 0.020   |
| Everolimus           | 0.001   | GSK461364        | 0.004   | GSK1120212       | 0.000   | GSK1838705       | 0.015   |
| Fascaplysin          | 0.004   | GSK2119563       | 0.049   | GSK461364        | 0.001   | GSK2119563       | 0.029   |
| GSK1070916           | 0.035   | MG.132           | 0.017   | ICRF.193         | 0.000   | GSK2126458       | 0.004   |
| GSK1120212           | 0.003   | PF.4691502       | 0.041   | PF.3814735       | 0.023   | GSK1059615       | 0.021   |
| GSK1059868           | 0.018   | Vorinostat       | 0.022   | Pemetrexed       | 0.000   | GSK650394        | 0.038   |
| GSK461364            | 0.016   | Bosutinib        | 0.018   | VX.680           | 0.020   | Lapatinib        | >0.001  |
| GSK2119563           | 0.022   | Tamoxifen        | 0.044   | ZM447439         | 0.010   | Geldanamycin     | 0.021   |
| GSK2126458           | 0.008   | Trichostatin.A   | 0.048   |                  |         | Gefitinib        | 0.003   |
| GSK2141795           | 0.009   |                  |         |                  |         | NU6102           | 0.000   |
| GSK650394            | 0.029   |                  |         |                  |         | Olomoucine.II    | 0.031   |
| Lapatinib            | 0.036   |                  |         |                  |         | PF.2341066       | 0.005   |
| IKK.16               | 0.003   |                  |         |                  |         | PF.3814735       | 0.007   |
| LBH589               | 0.005   |                  |         |                  |         | Temsirolimus     | 0.039   |
| MG.132               | 0.008   |                  |         |                  |         | VX.680           | 0.019   |
| NU6102               | 0.028   |                  |         |                  |         |                  |         |
| PF.4691502           | 0.000   |                  |         |                  |         |                  |         |
| Rapamycin            | 0.001   |                  |         |                  |         |                  |         |
| Vorinostat           | 0.001   |                  |         |                  |         |                  |         |
| Bosutinib            | 0.003   |                  |         |                  |         |                  |         |
| Sunitinib.Malate     | 0.015   |                  |         |                  |         |                  |         |
| Temsirolimus         | 0.032   |                  |         |                  |         |                  |         |
| Trichostatin.A       | 0.000   |                  |         |                  |         |                  |         |

**Supplemental Table 14:** *ASSIGN* parameters used for all analyses. The default values were used for all other parameters.

| <b>Parameter</b> | <b>Value</b> |
|------------------|--------------|
| adaptive_B       | TRUE         |
| adaptive_S       | TRUE         |
| mixture_beta     | FALSE        |
| S_zeroPrior      | FALSE        |
| sigma_sZero      | 0.05         |
| sigma_sNonZero   | 0.5          |
| iter             | 100,000      |
| burn_in          | 50,000       |
